# Supplementary material
Source: ML conference proceedings conference paper supplement (https://openaccess.thecvf.com/content/CVPR_2020/html/Nizan_Breaking_the_Cycle_CVPR_2020_paper.html)
Supplement: Supplementary file 1 [file Nizan_Breaking_the_Cycle_CVPR_2020_supplemental.zip]

# Breaking the cycle—Colleagues are all you need

## Supplementary #3—Results: male-to-female Translation

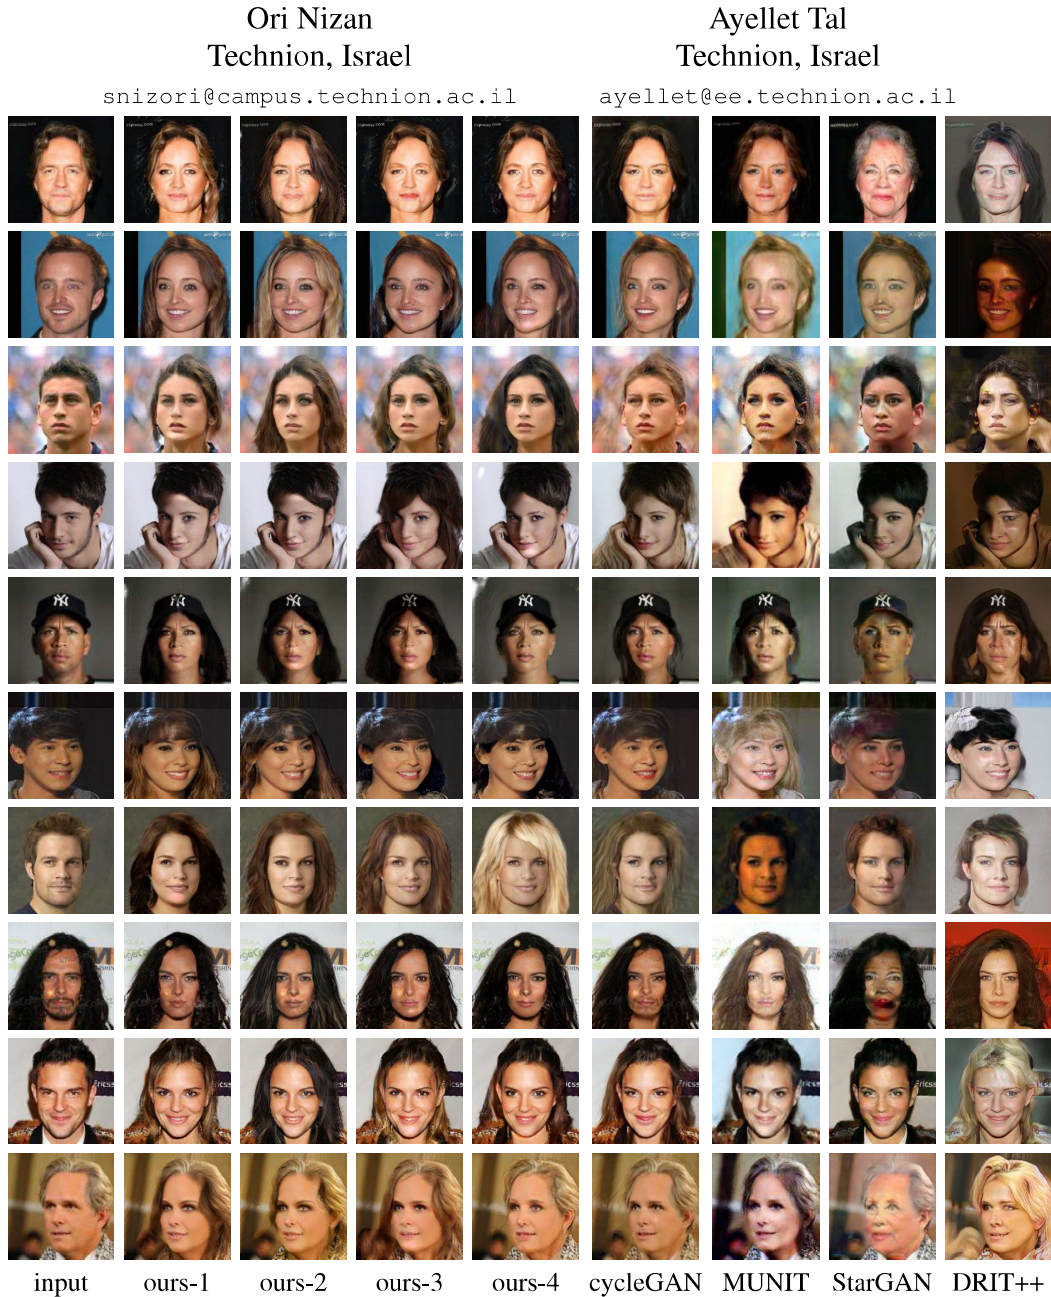

Figure 1: Male-to-female translation



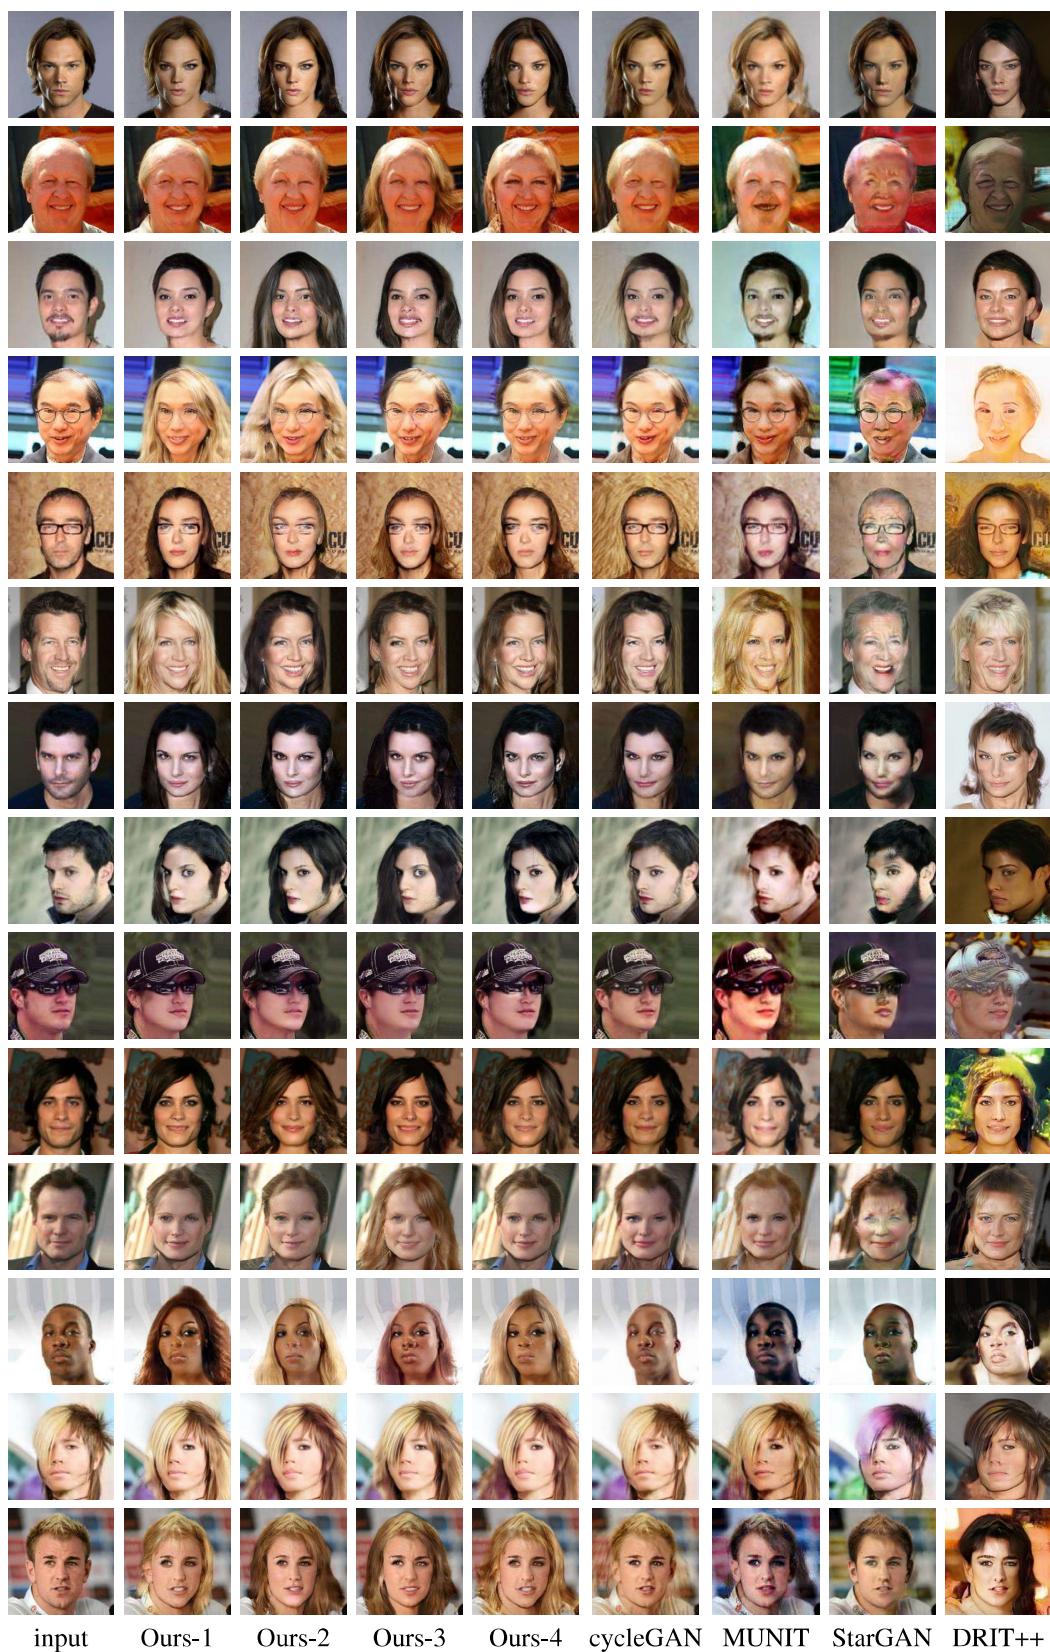

Figure 2: **Male-to-female translation**



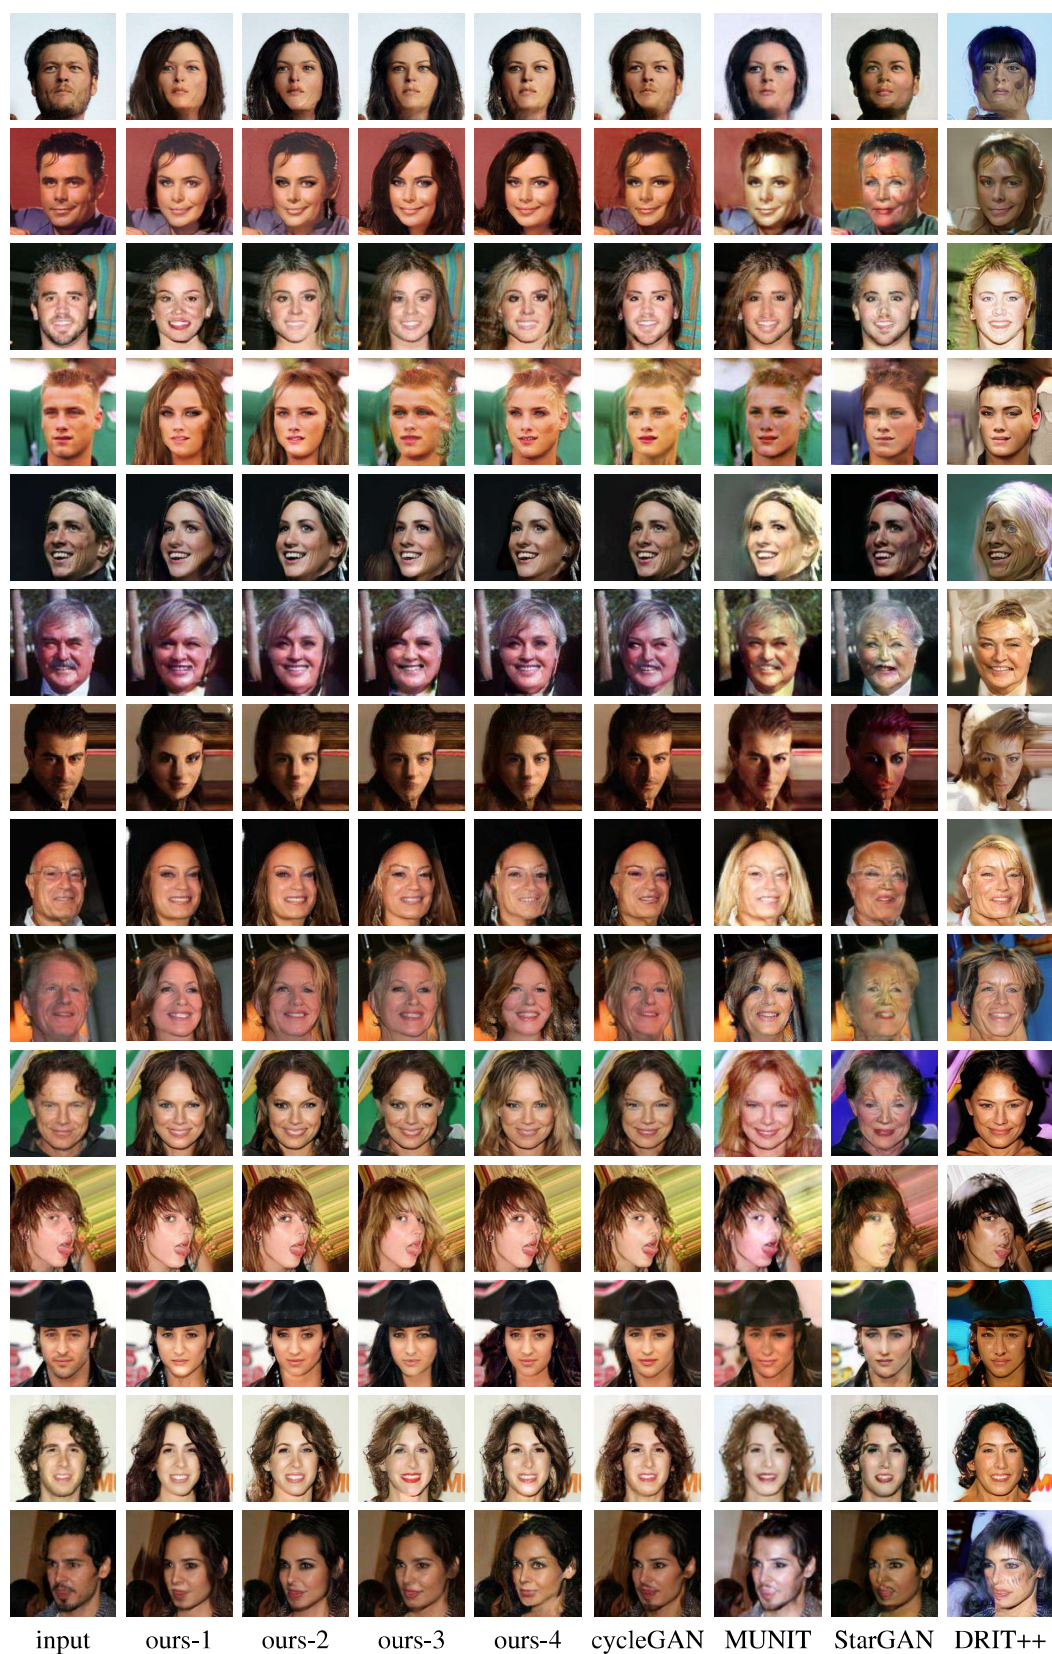

Figure 3: **Male-to-female translation**



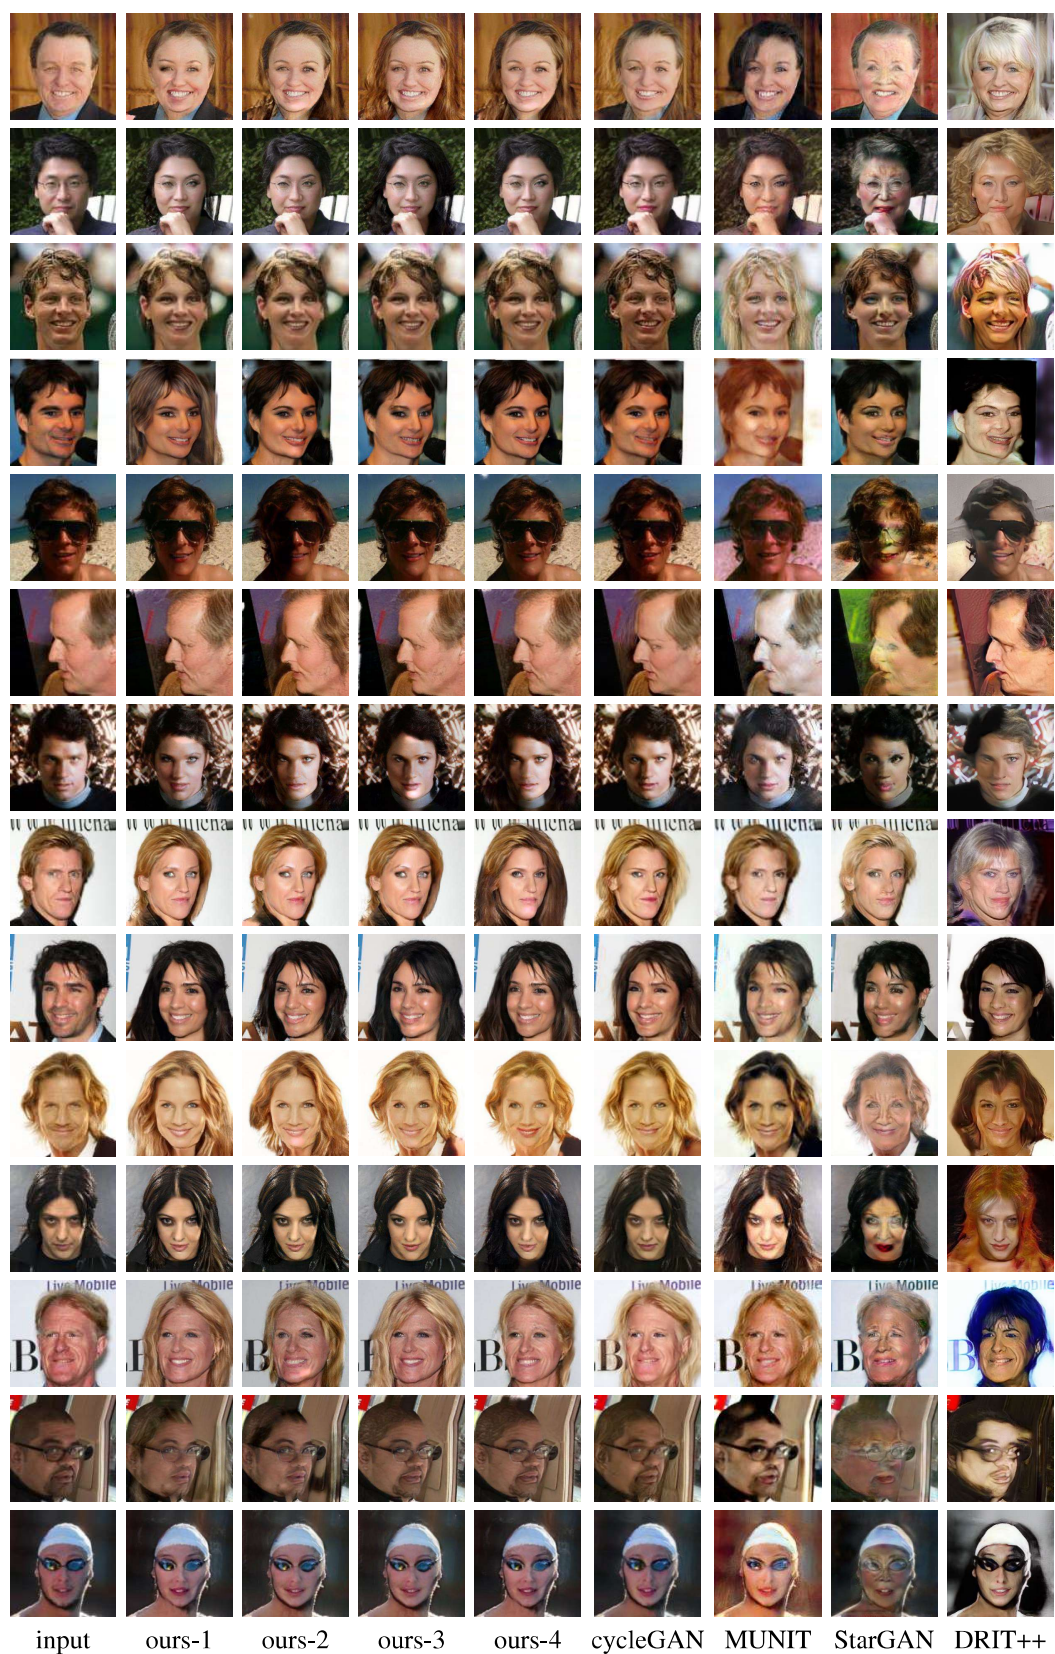

Figure 4: **Male-to-female translation**



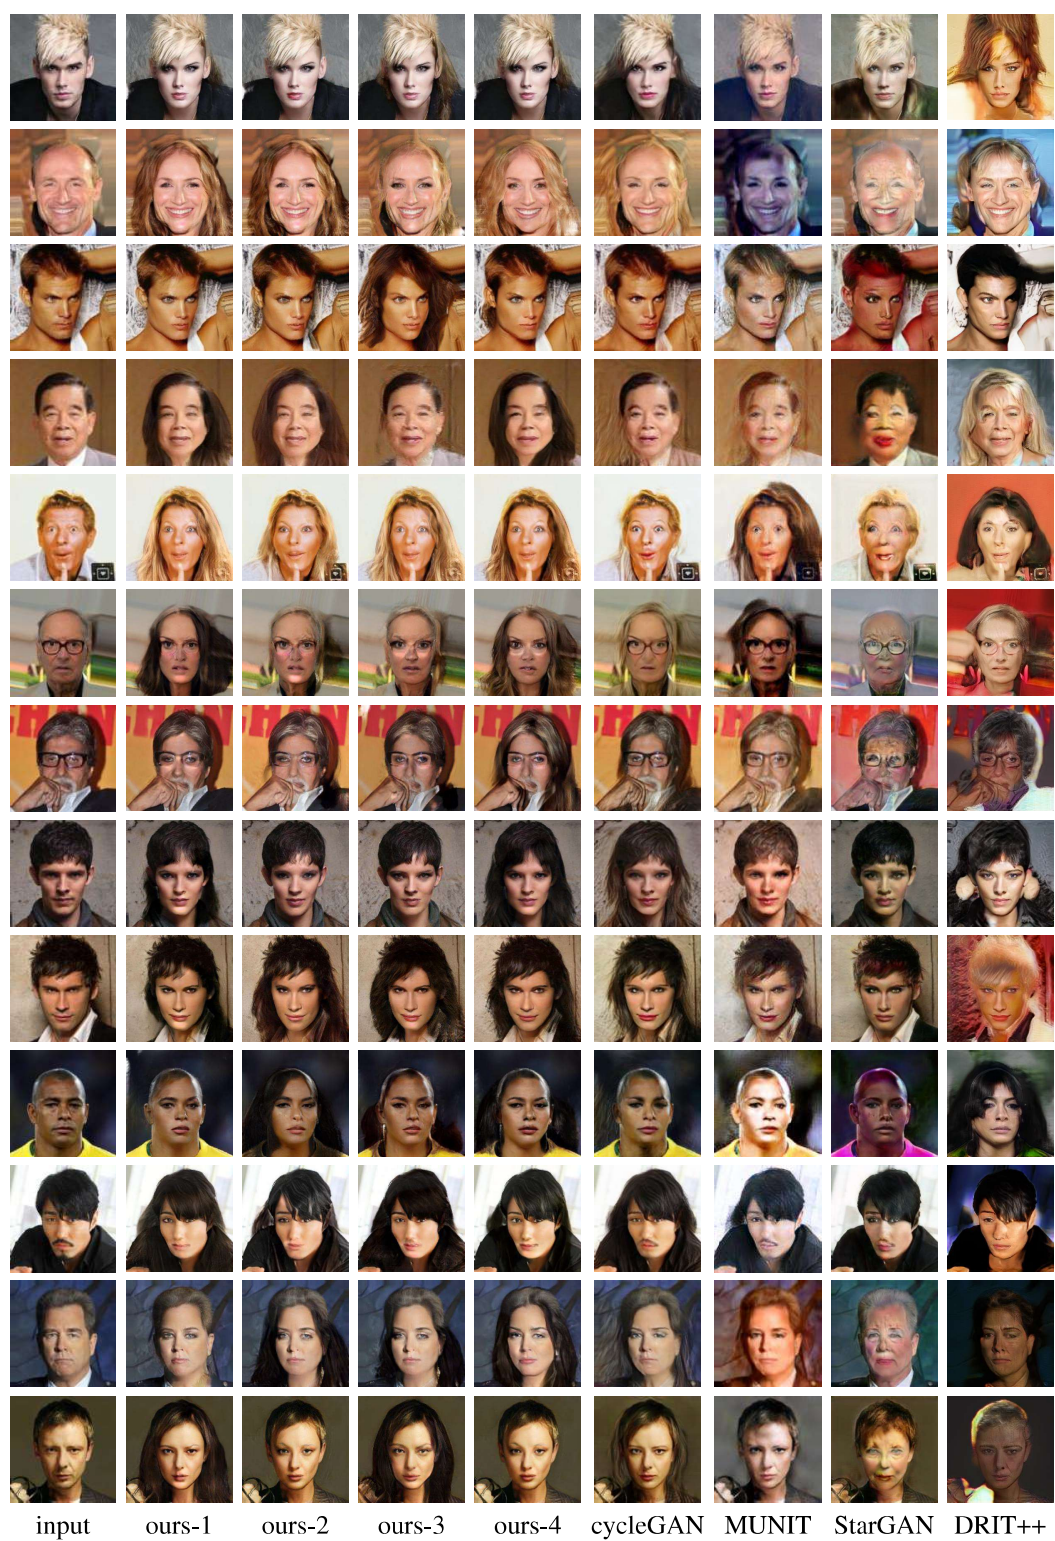

Figure 5: **Male-to-female translation**



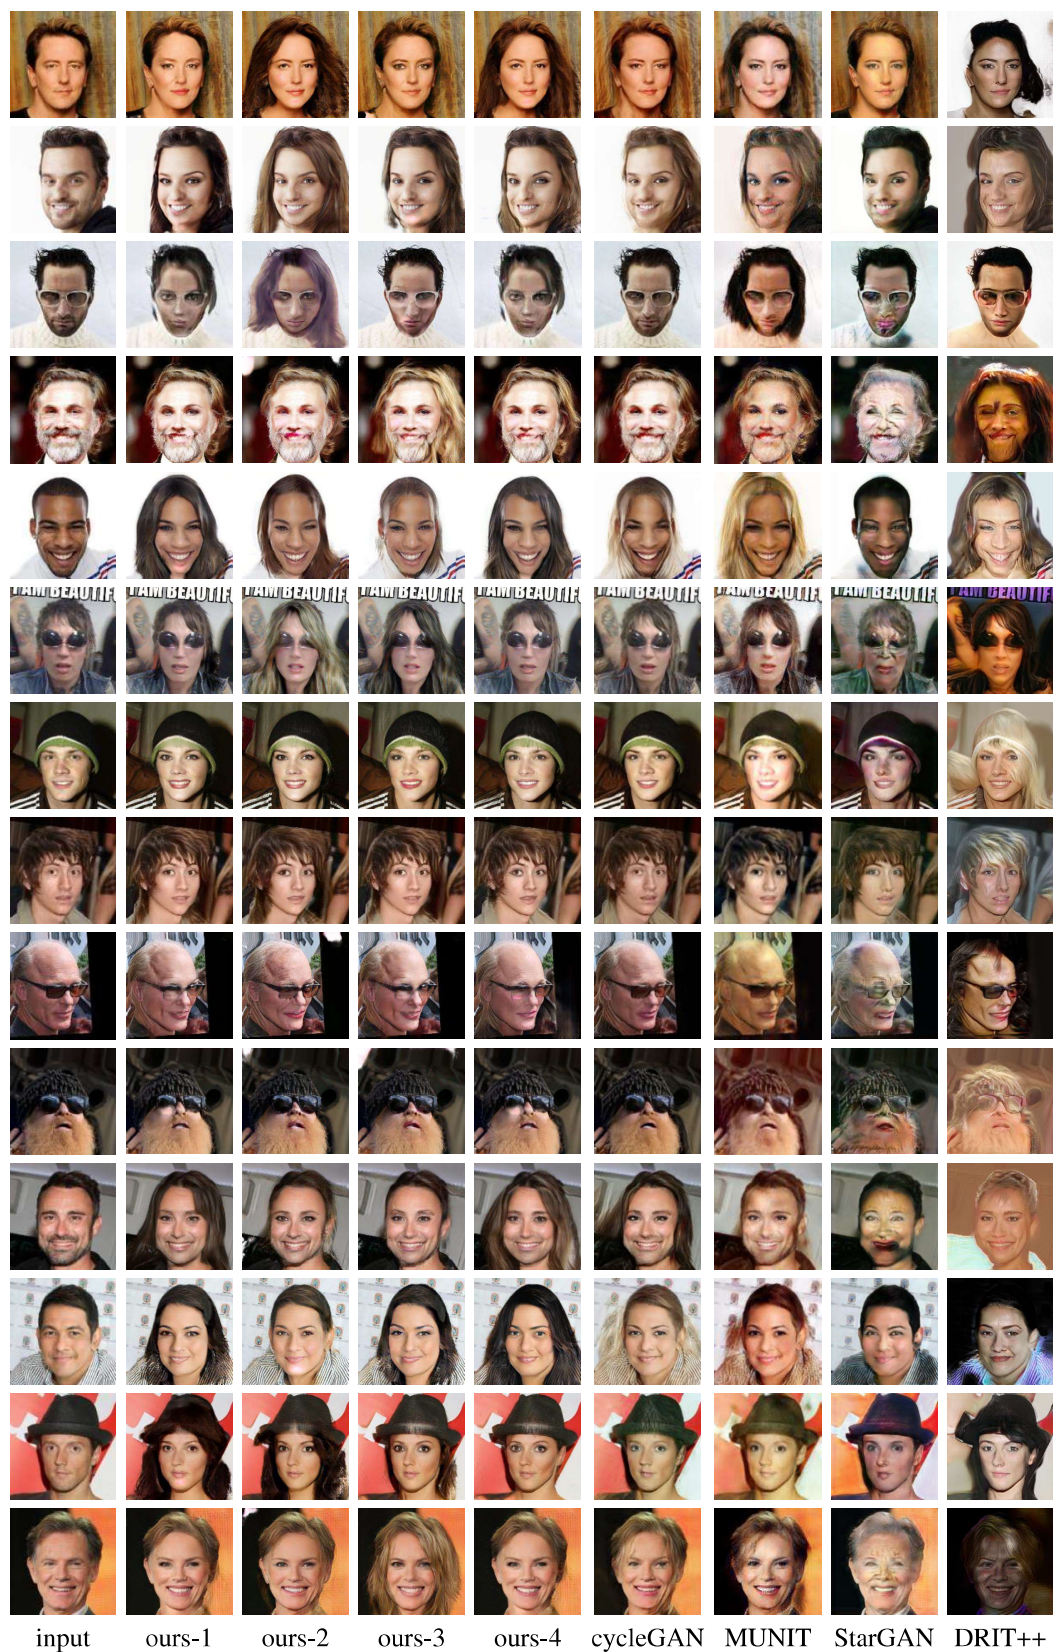

Figure 6: **Male-to-female translation**



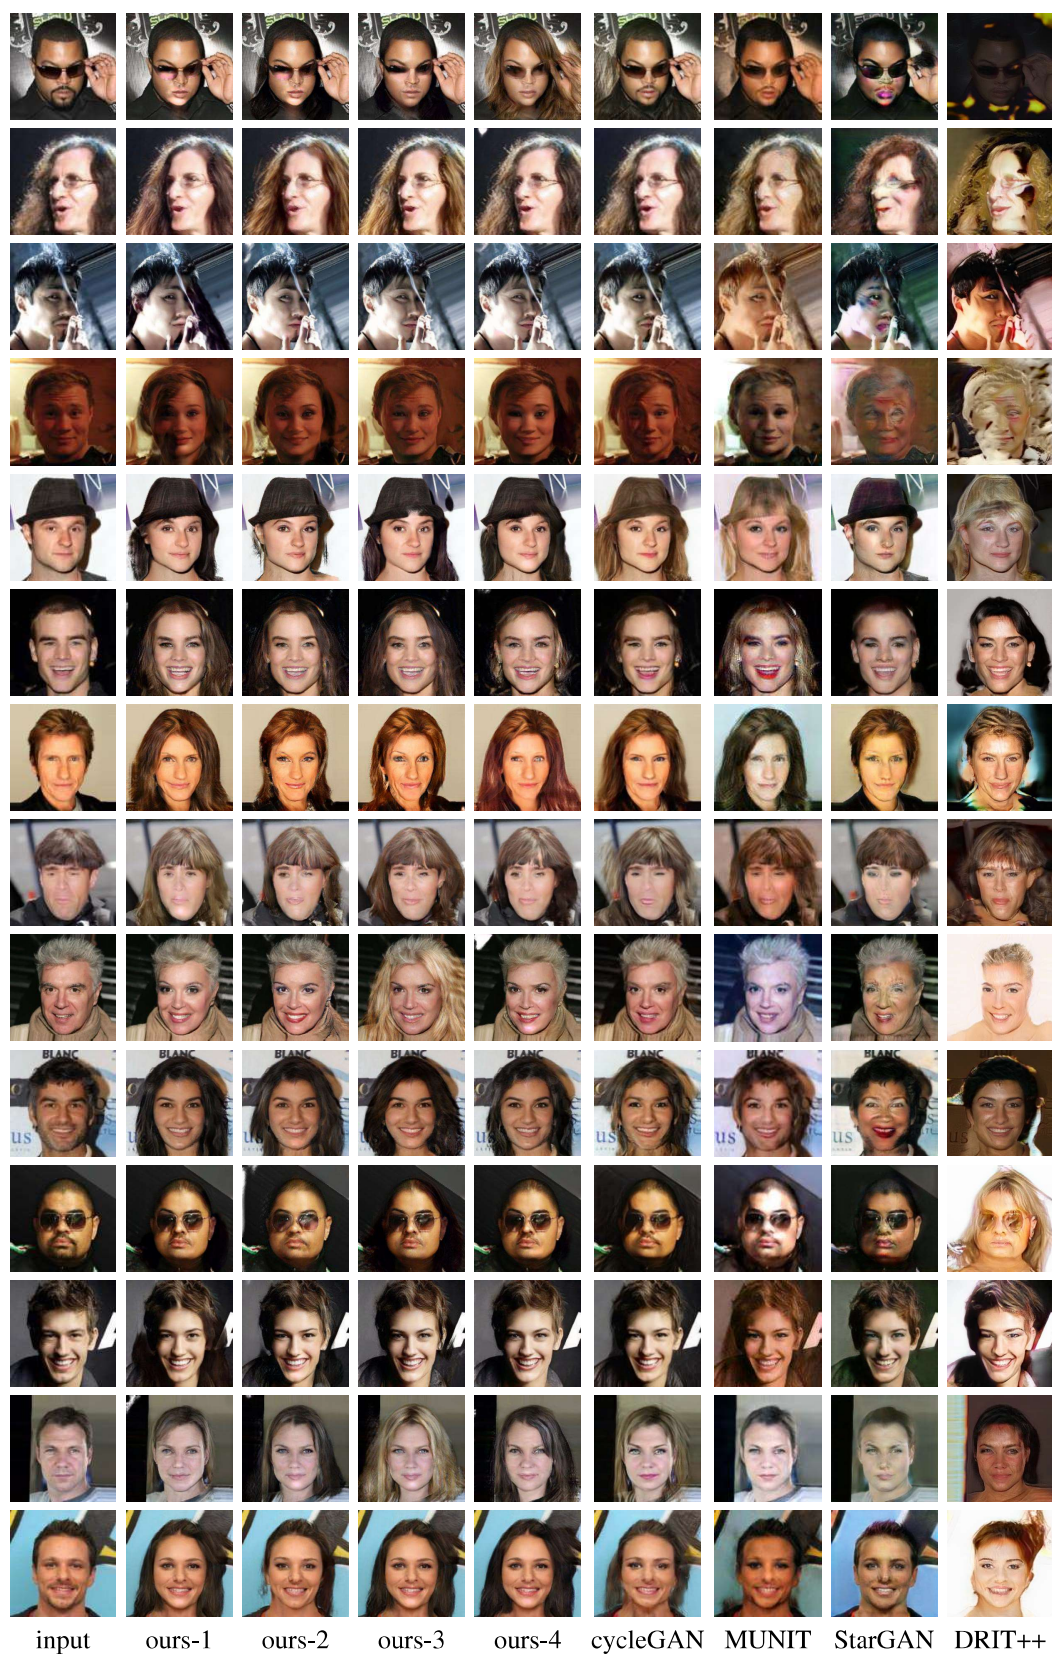

Figure 7: **Male-to-female translation**

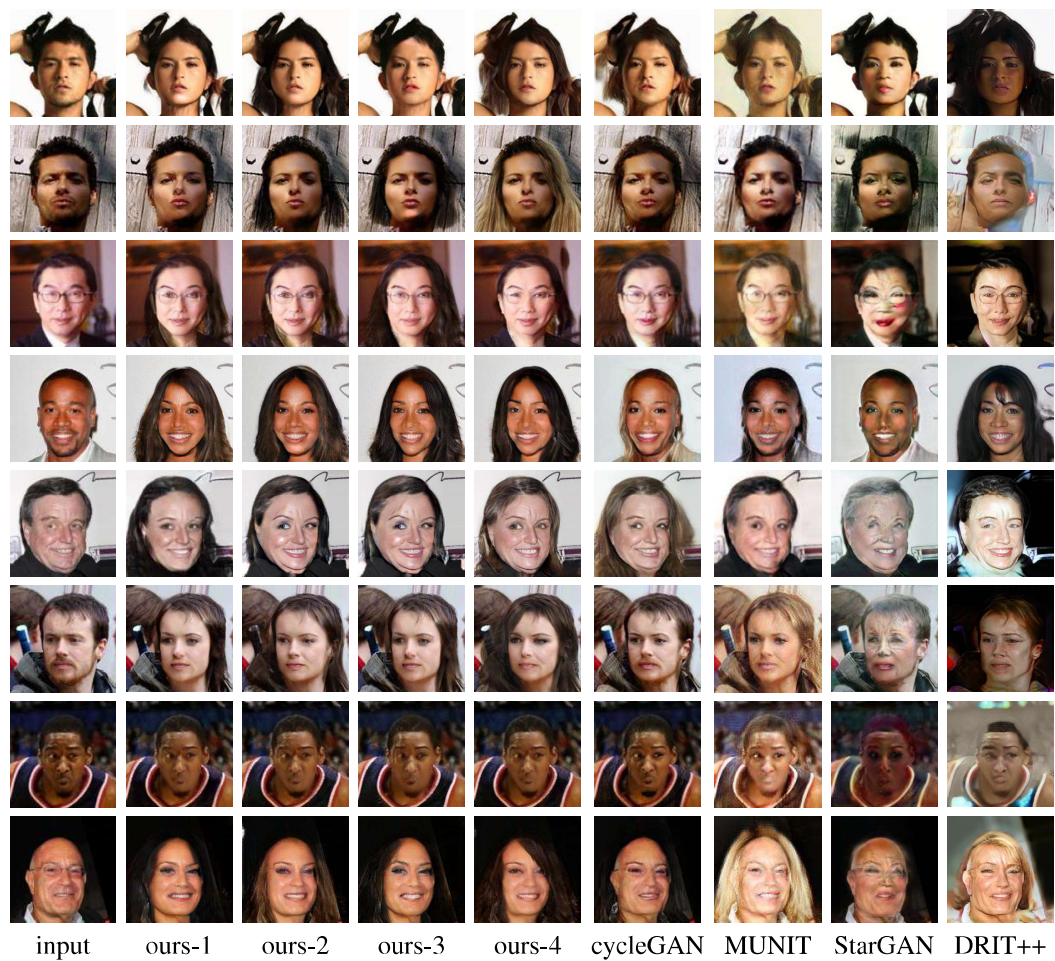

Figure 8: **Male-to-female translation**
