# Supplementary material
Source: ML conference proceedings conference paper supplement (https://openaccess.thecvf.com/content/CVPR_2020/html/Nizan_Breaking_the_Cycle_CVPR_2020_paper.html)
Supplement: Supplementary file 2 [file Nizan_Breaking_the_Cycle_CVPR_2020_supplemental.zip]

# Breaking the cycle—Colleagues are all you need

## Supplementary #2—Results: Glasses Removal

Ori Nizan  
Technion, Israel

snizori@campus.technion.ac.il

Ayellet Tal  
Technion, Israel

ayellet@ee.technion.ac.il

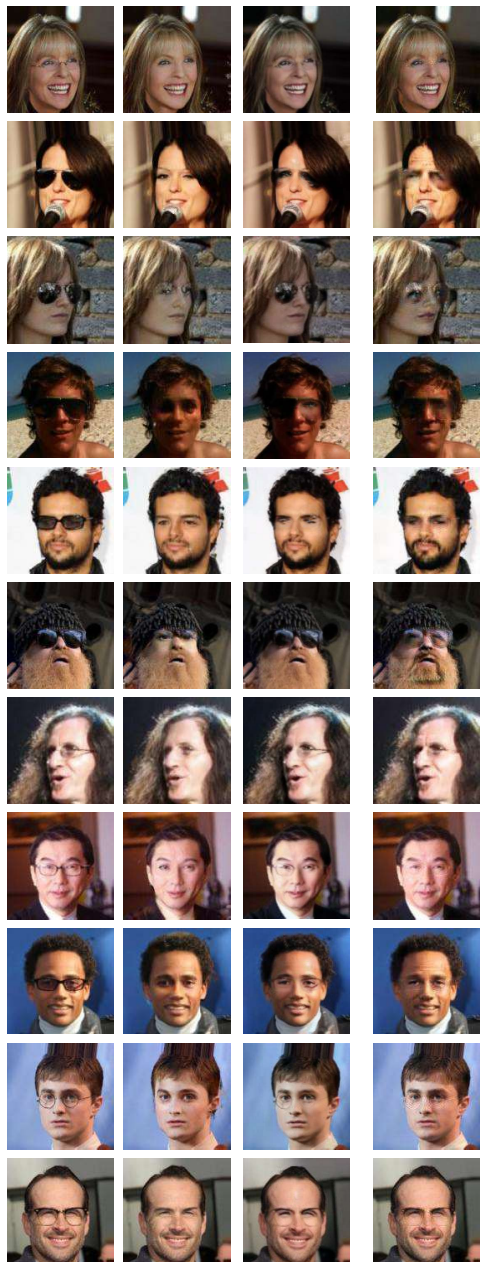

input    Ours    cycleGAN    Fixed-Point

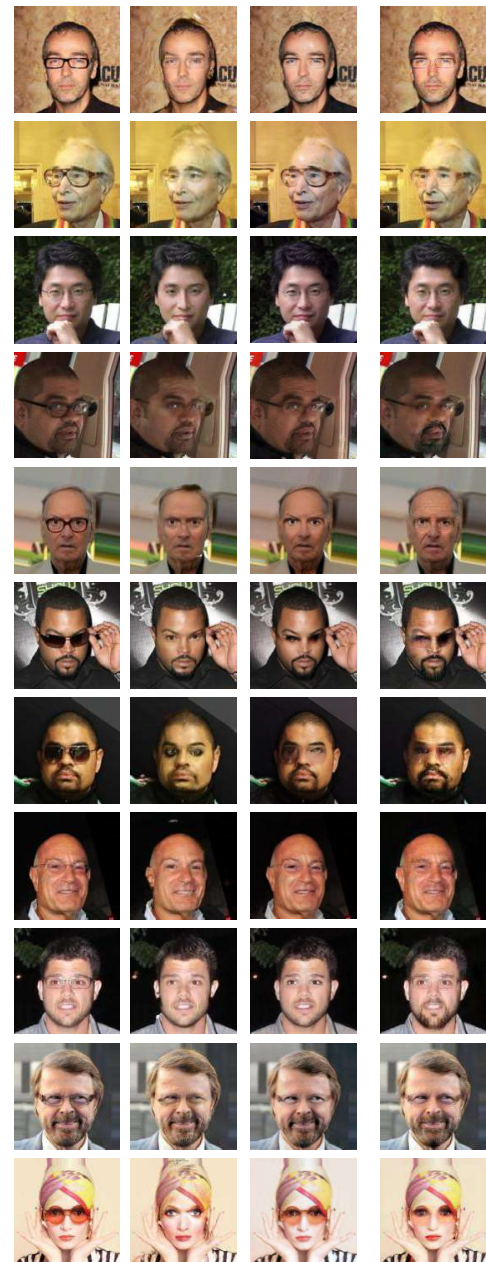

input    Ours    cycleGAN    Fixed-Point

Figure 1: glasses removal comparison.

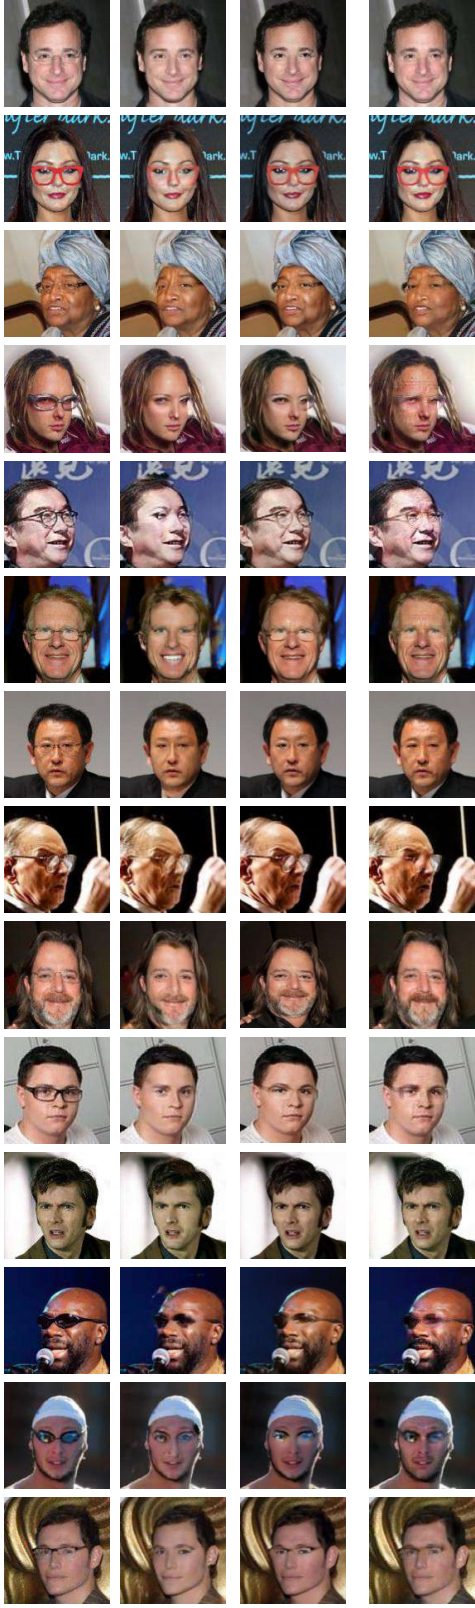

input    Ours    cycleGAN    Fixed-Point

Figure 2: glasses removal comparison.

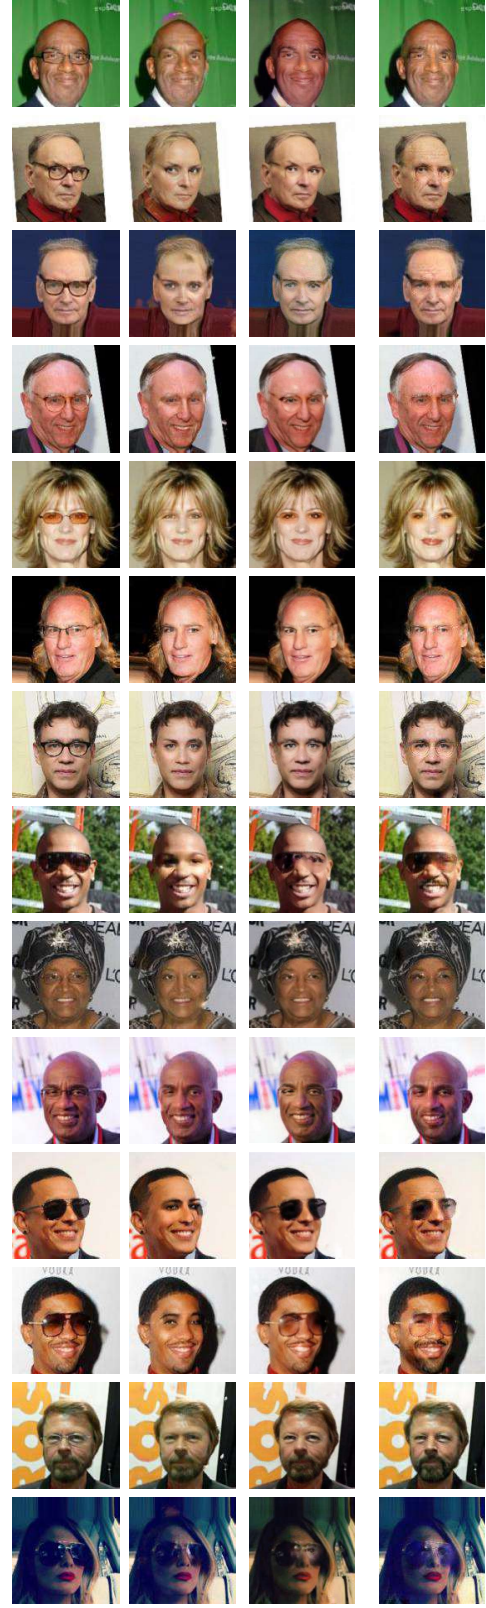

input    Ours    cycleGAN    Fixed-Point

Figure 3: glasses removal comparison.



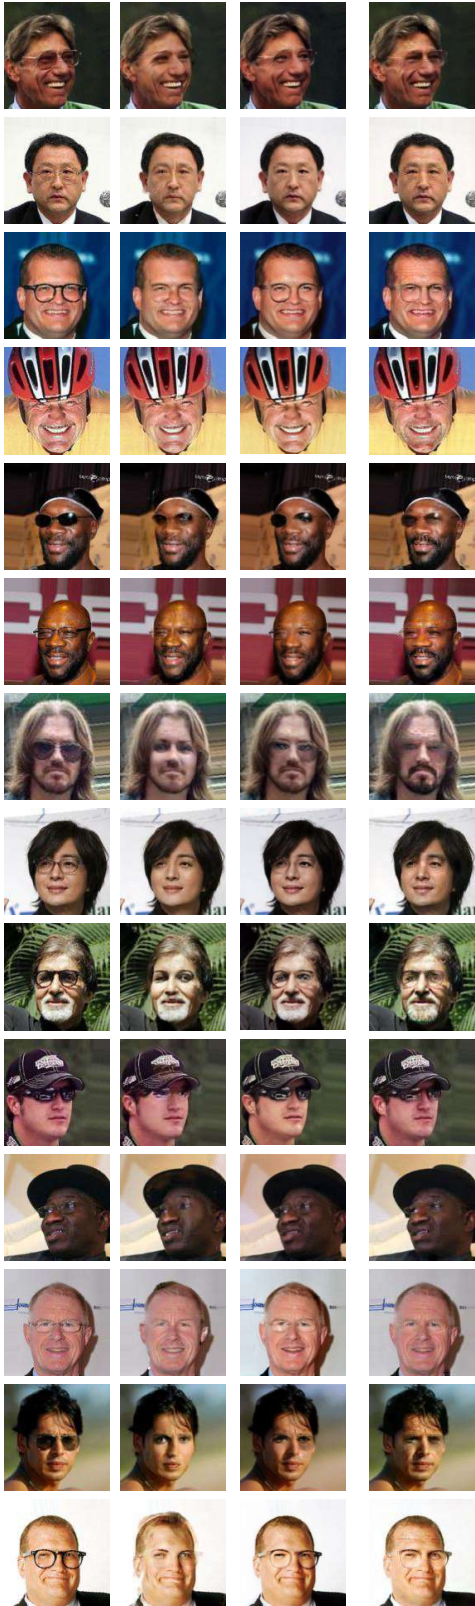

input Ours cycleGAN Fixed-Point

Figure 4: glasses removal comparison.

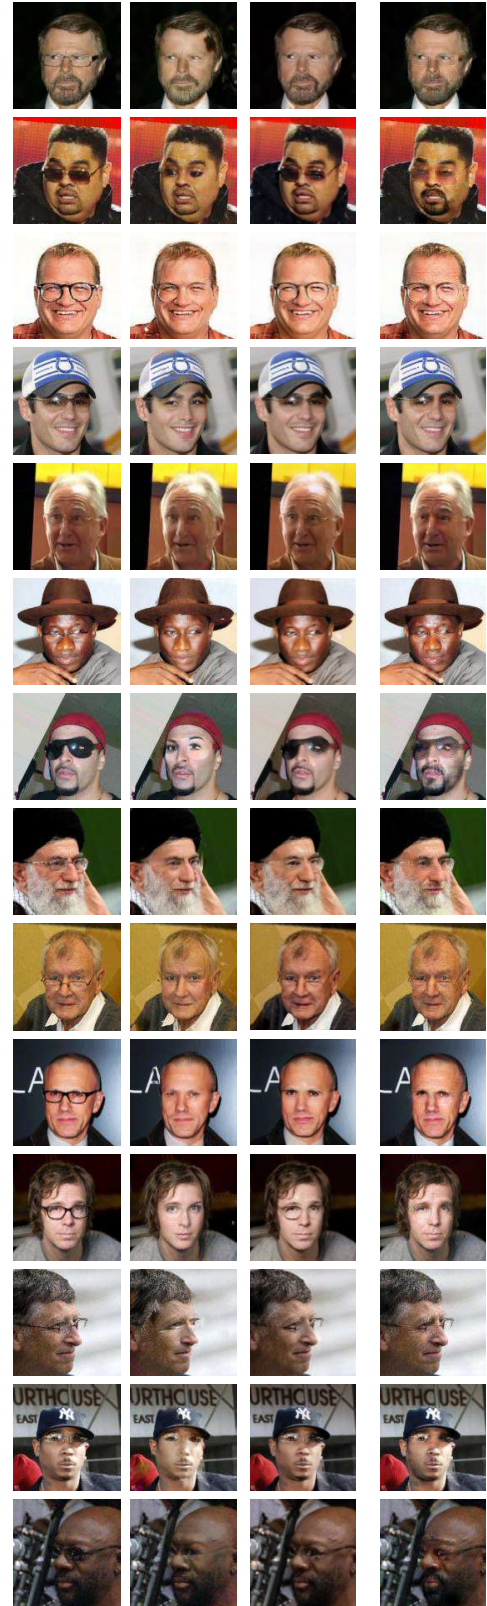

input Ours cycleGAN Fixed-Point

Figure 5: glasses removal comparison.



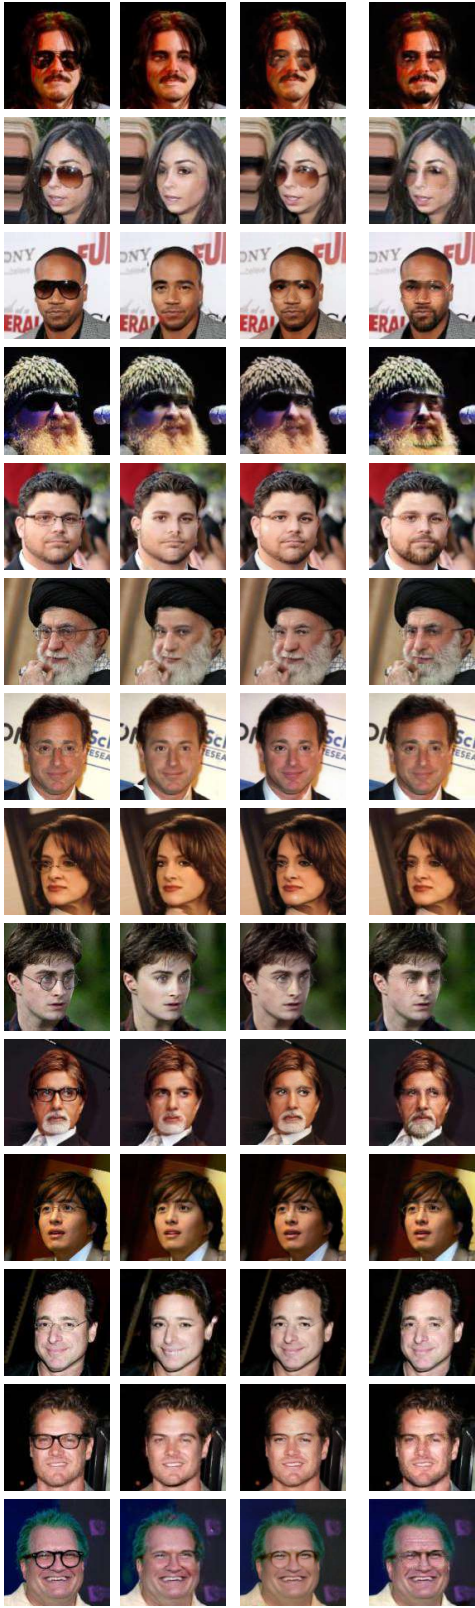

input      Ours      cycleGAN      Fixed-Point

Figure 6: glasses removal comparison.

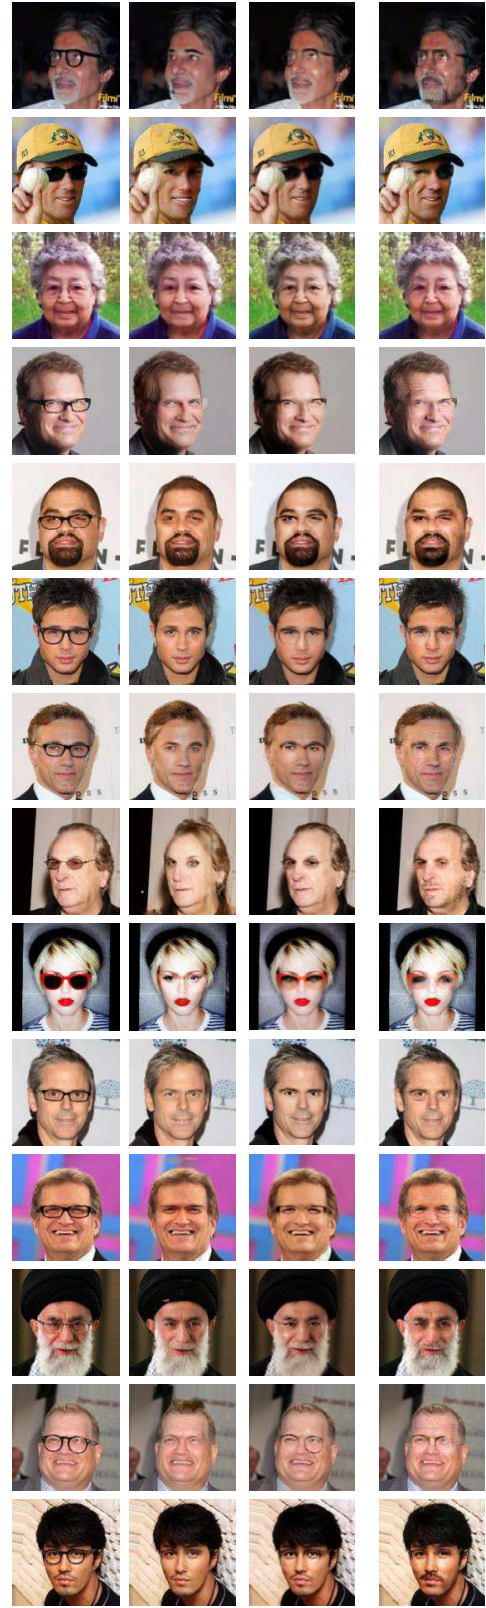

input      Ours      cycleGAN      Fixed-Point

Figure 7: glasses removal comparison.



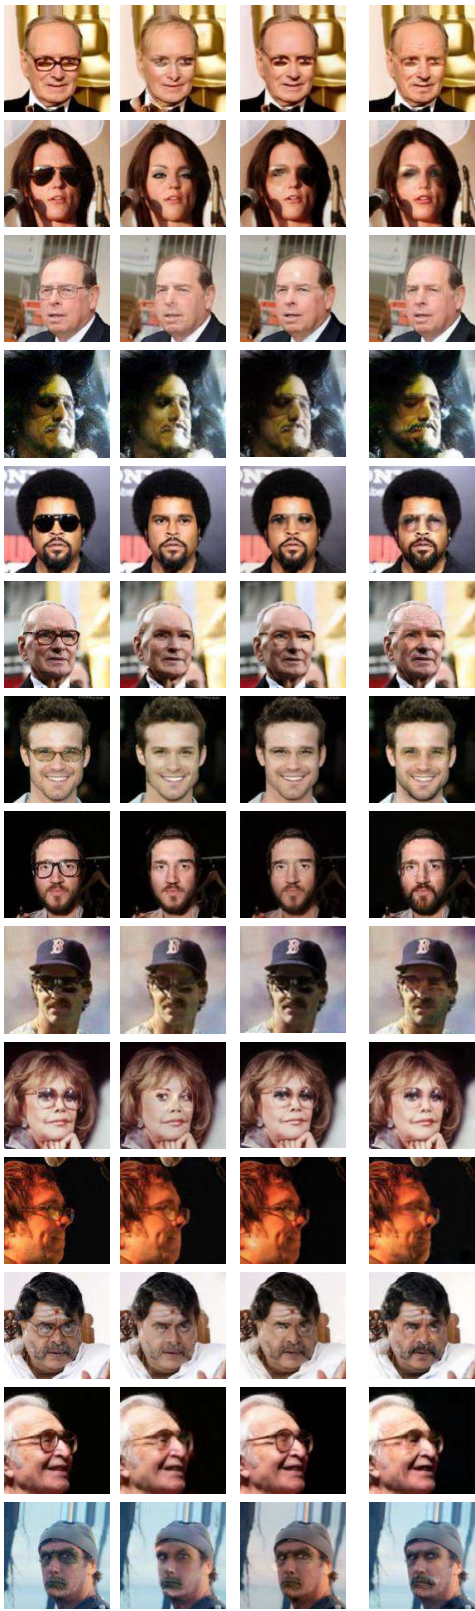

input    Ours    cycleGAN    Fixed-Point

Figure 8: glasses removal comparison.

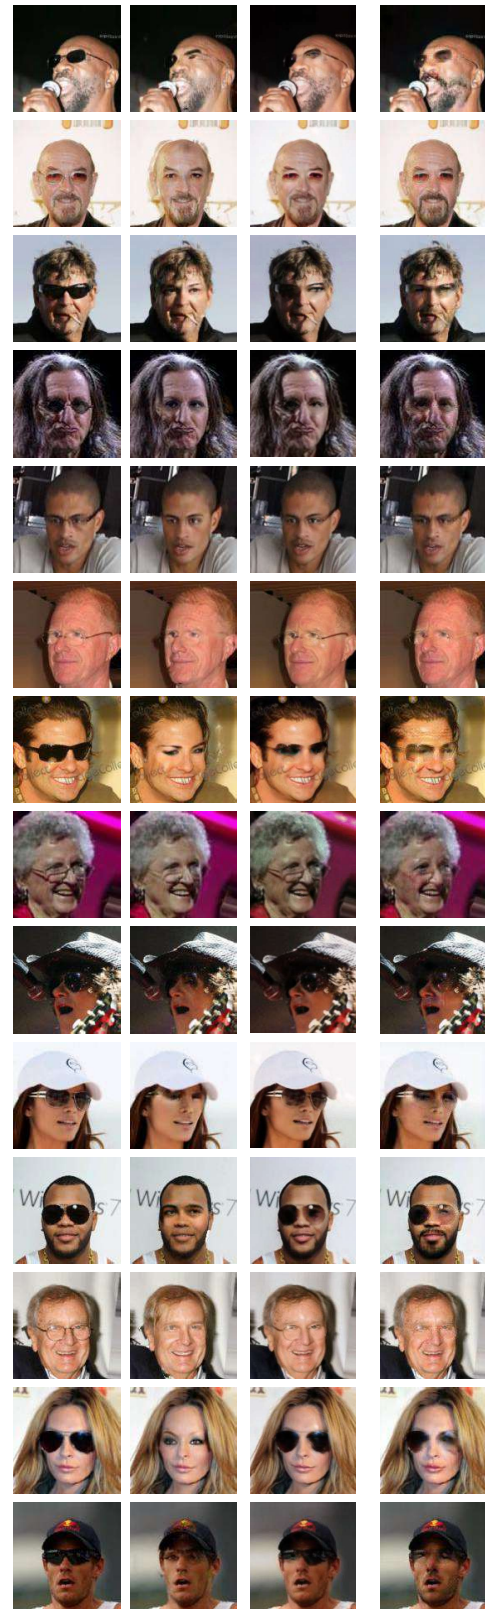

input    Ours    cycleGAN    Fixed-Point

Figure 9: glasses removal comparison.



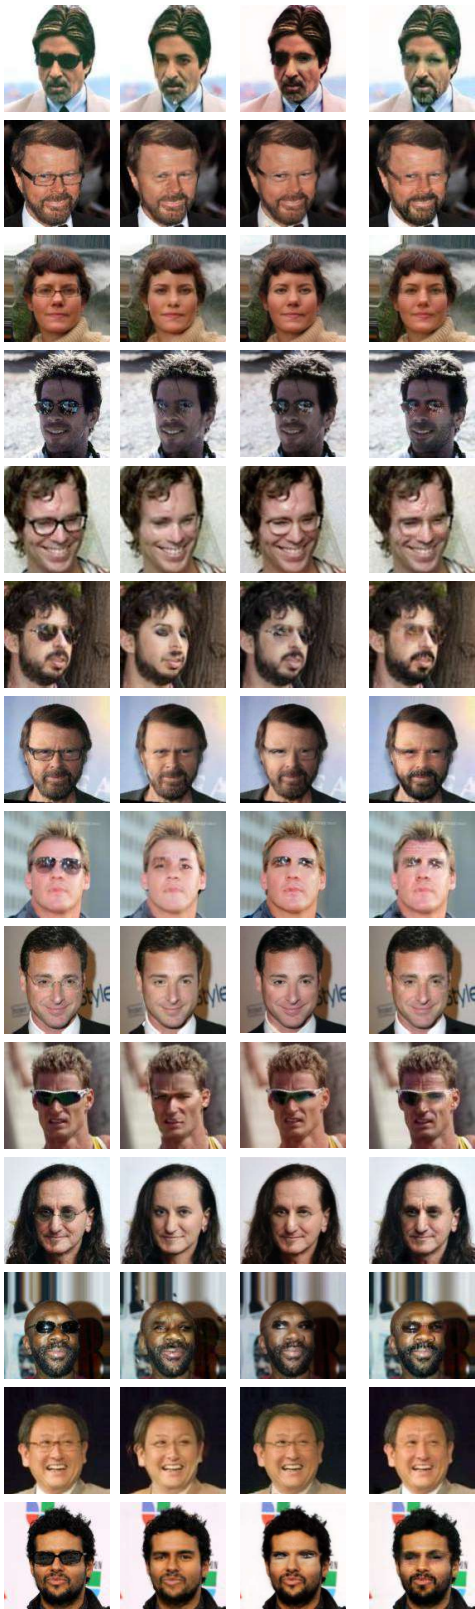

input Ours cycleGAN Fixed-Point

Figure 10: glasses removal comparison.

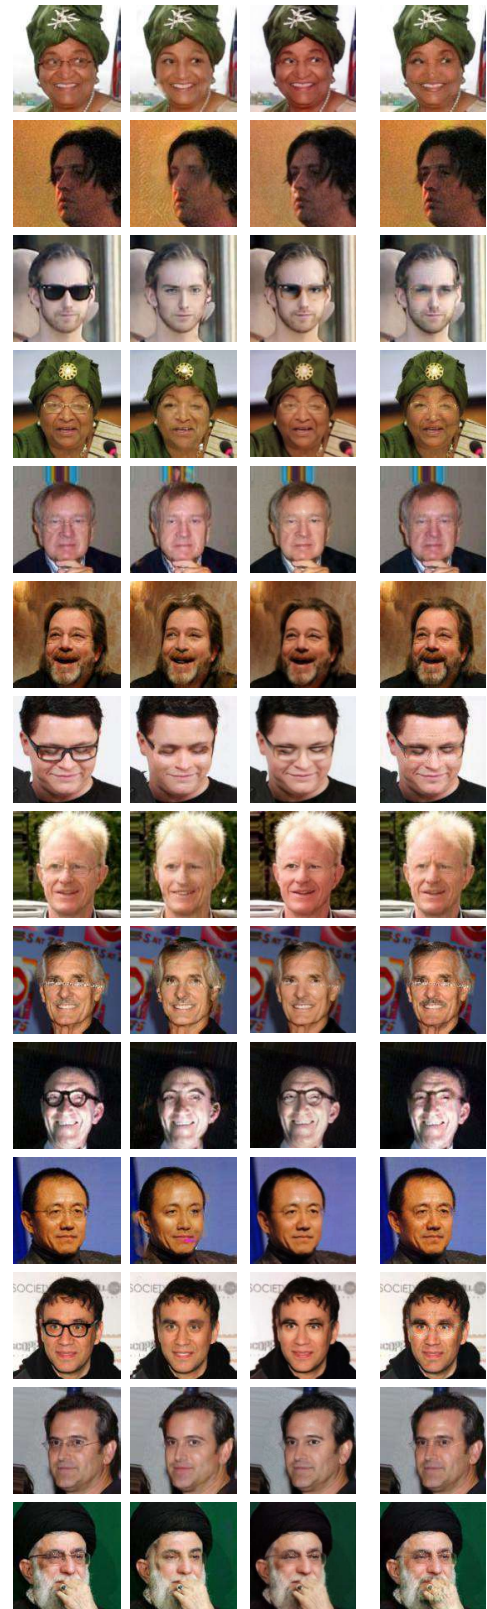

input Ours cycleGAN Fixed-Point

Figure 11: glasses removal comparison.



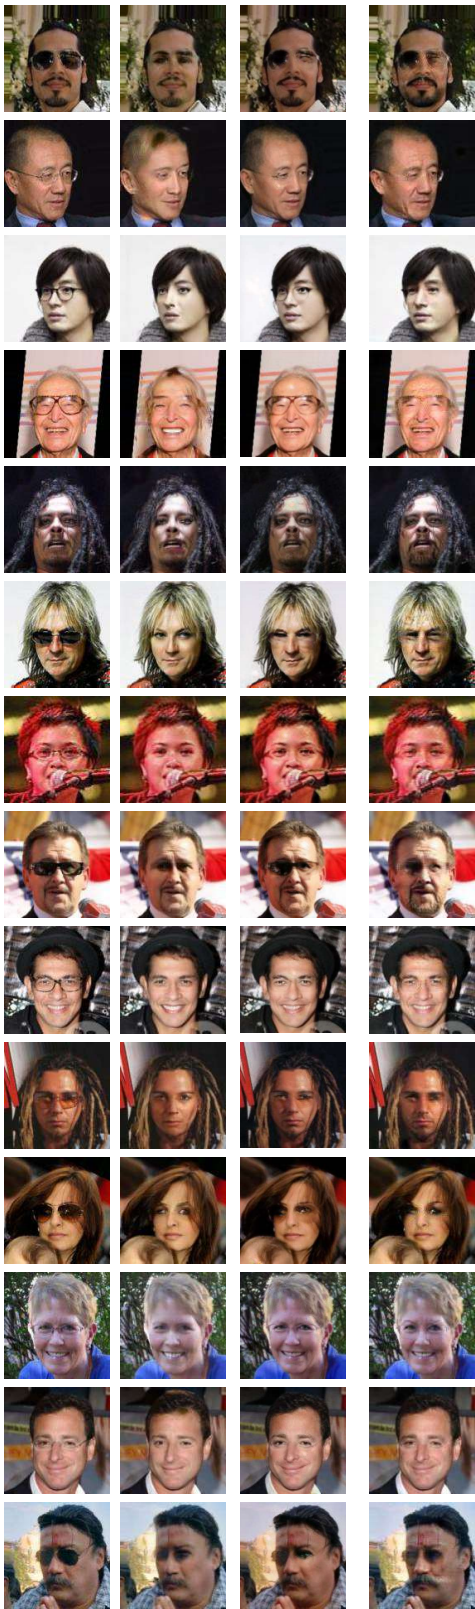

input Ours cycleGAN Fixed-Point

Figure 12: glasses removal comparison.

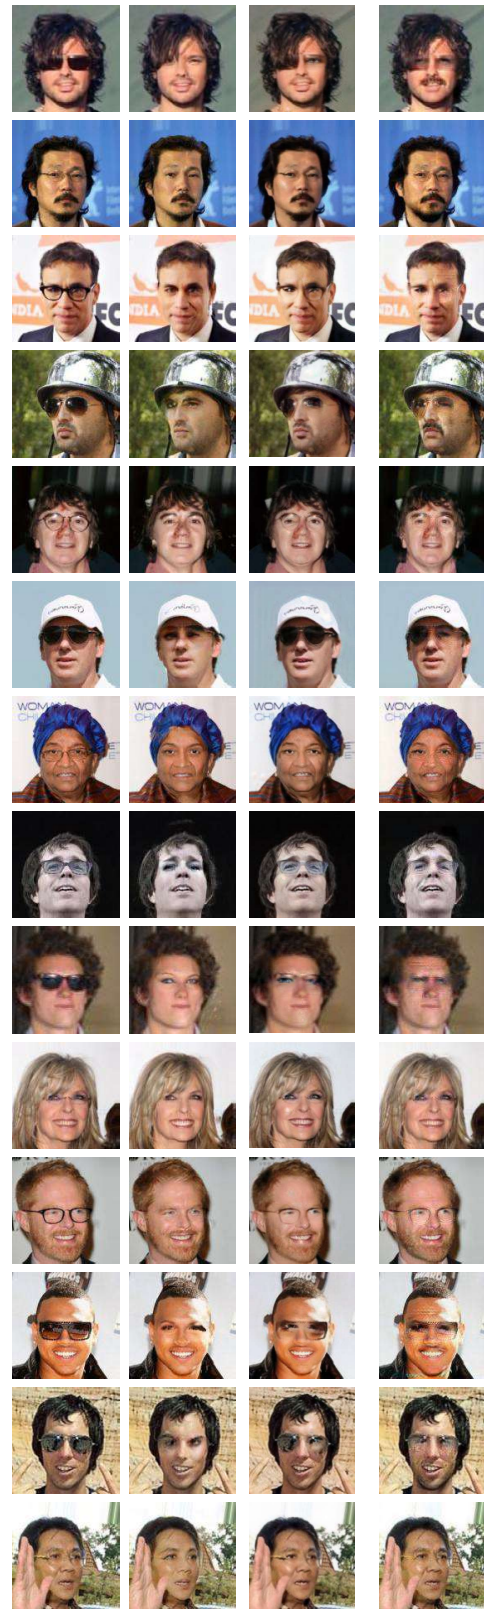

input Ours cycleGAN Fixed-Point

Figure 13: glasses removal comparison.
