# Supplementary material
Source: ML conference proceedings conference paper supplement (https://openaccess.thecvf.com/content/CVPR_2020/html/Nizan_Breaking_the_Cycle_CVPR_2020_paper.html)
Supplement: Supplementary file 3 [file Nizan_Breaking_the_Cycle_CVPR_2020_supplemental.zip]

# Breaking the cycle—Colleagues are all you need

## Supplementary #1—Results: Selfie-to-Anime Translation

Ori Nizan  
Technion, Israel

snizori@campus.technion.ac.il

Ayellet Tal  
Technion, Israel

ayellet@ee.technion.ac.il

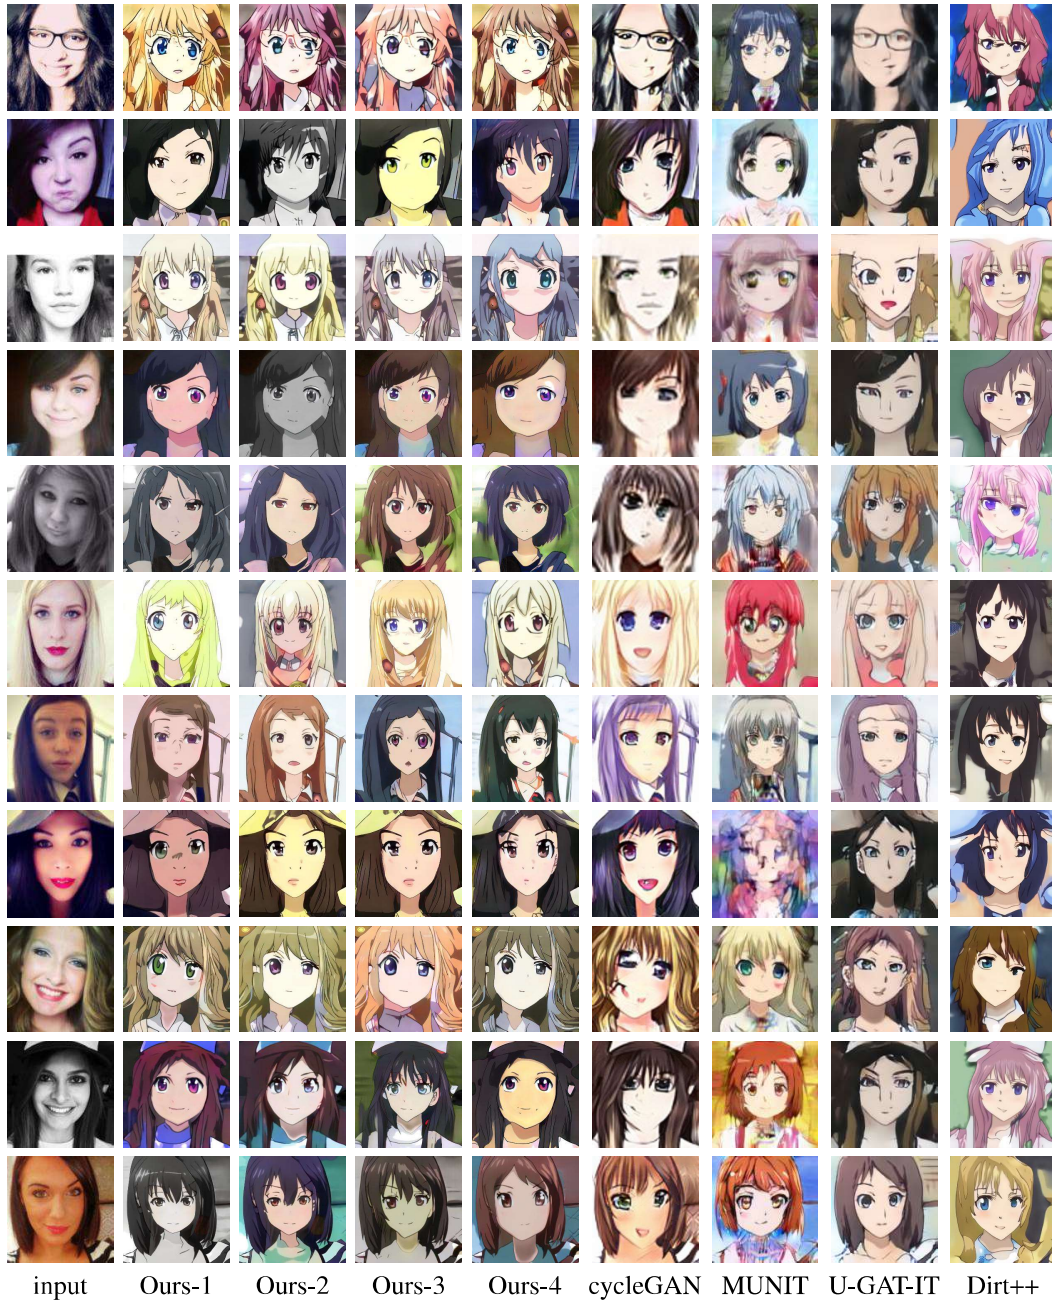

Figure 1: Selfie-to-anime translation



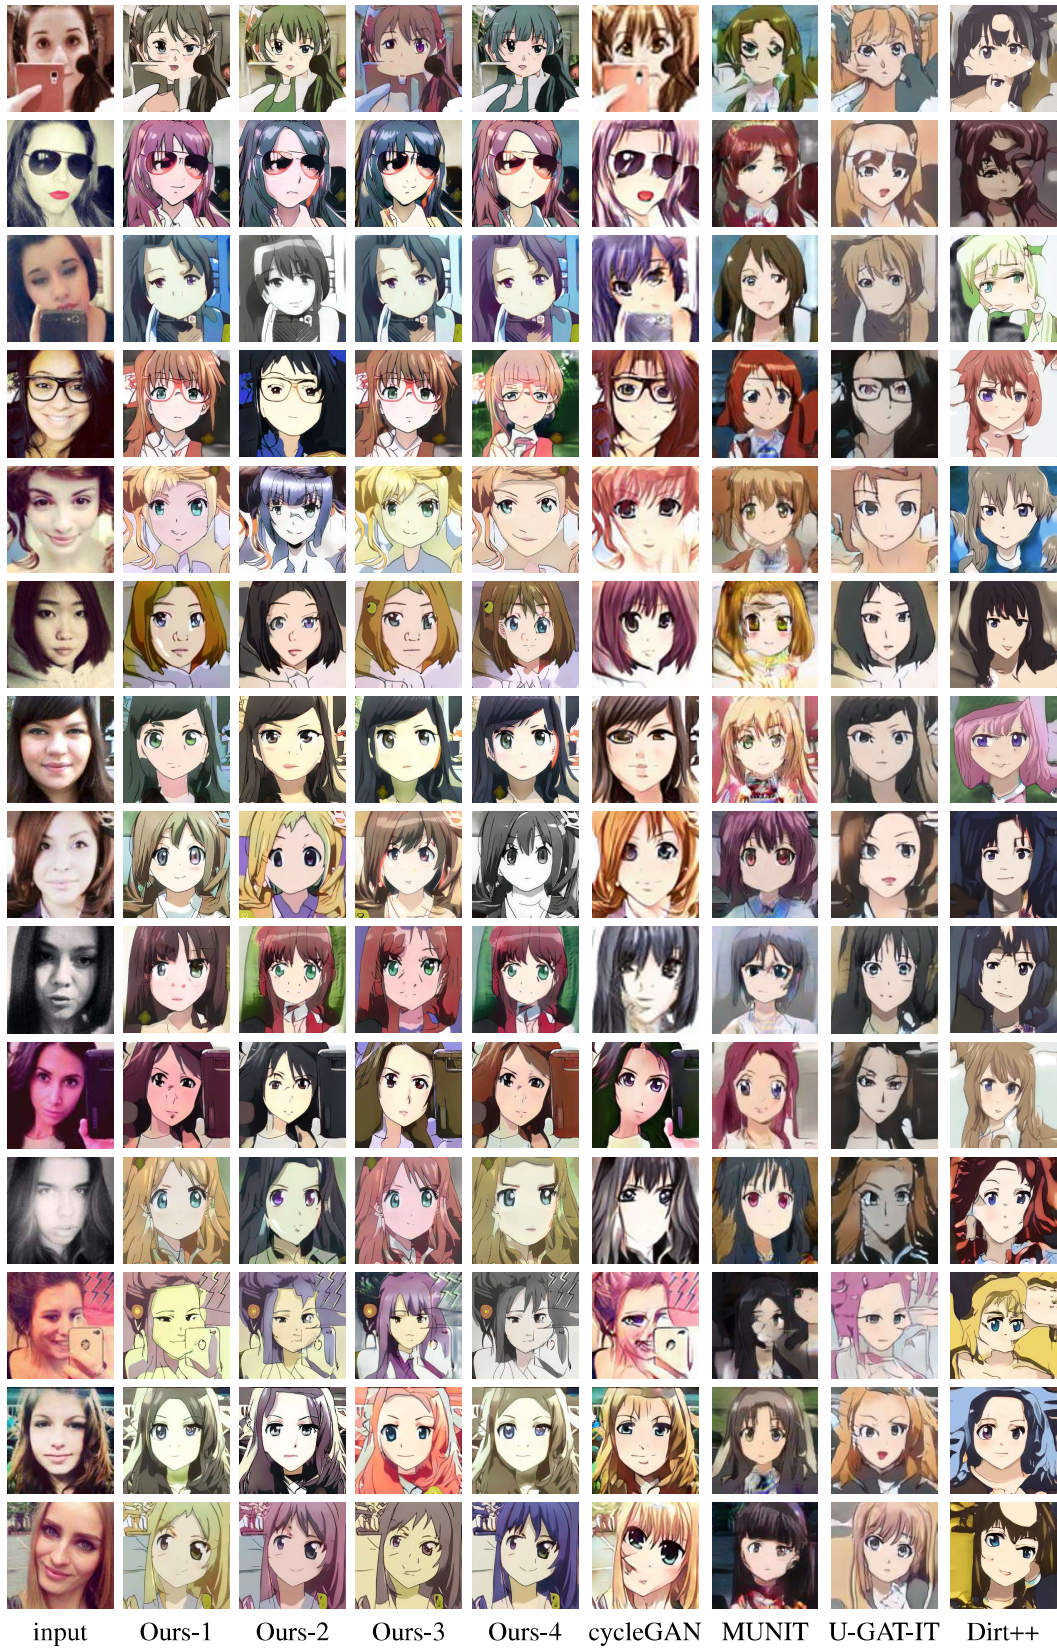

Figure 2: Selfie-to-anime translation



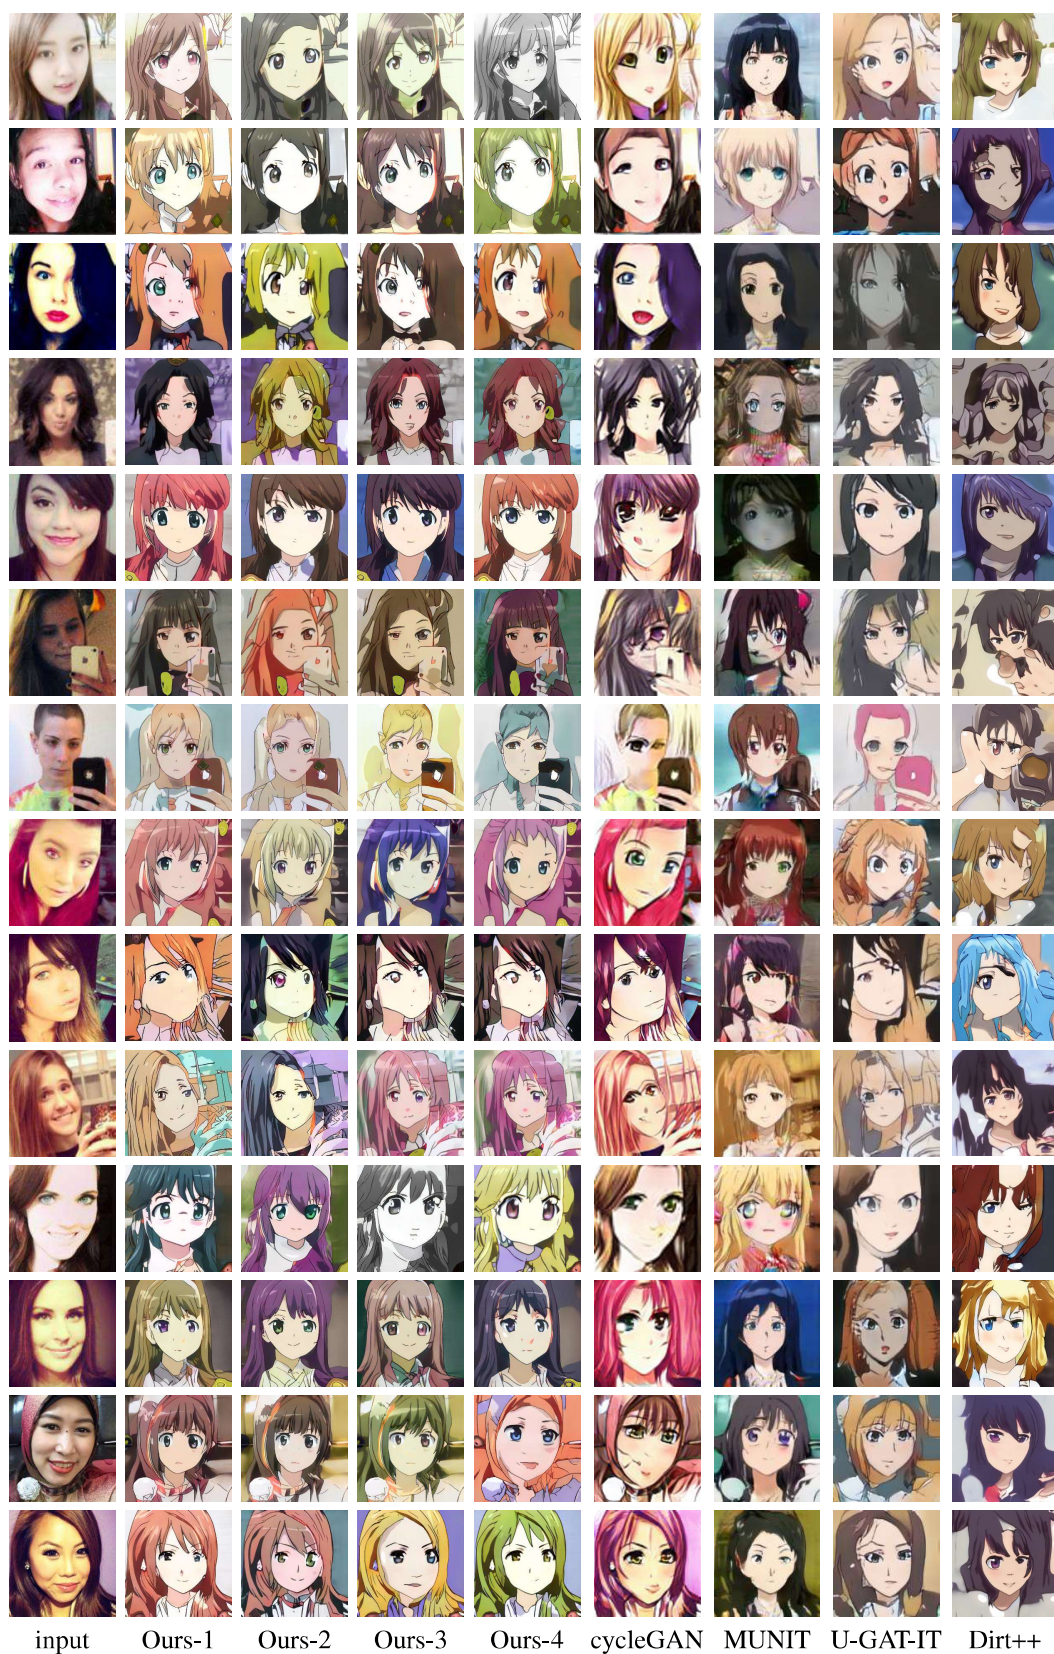

Figure 3: Selfie-to-anime translation



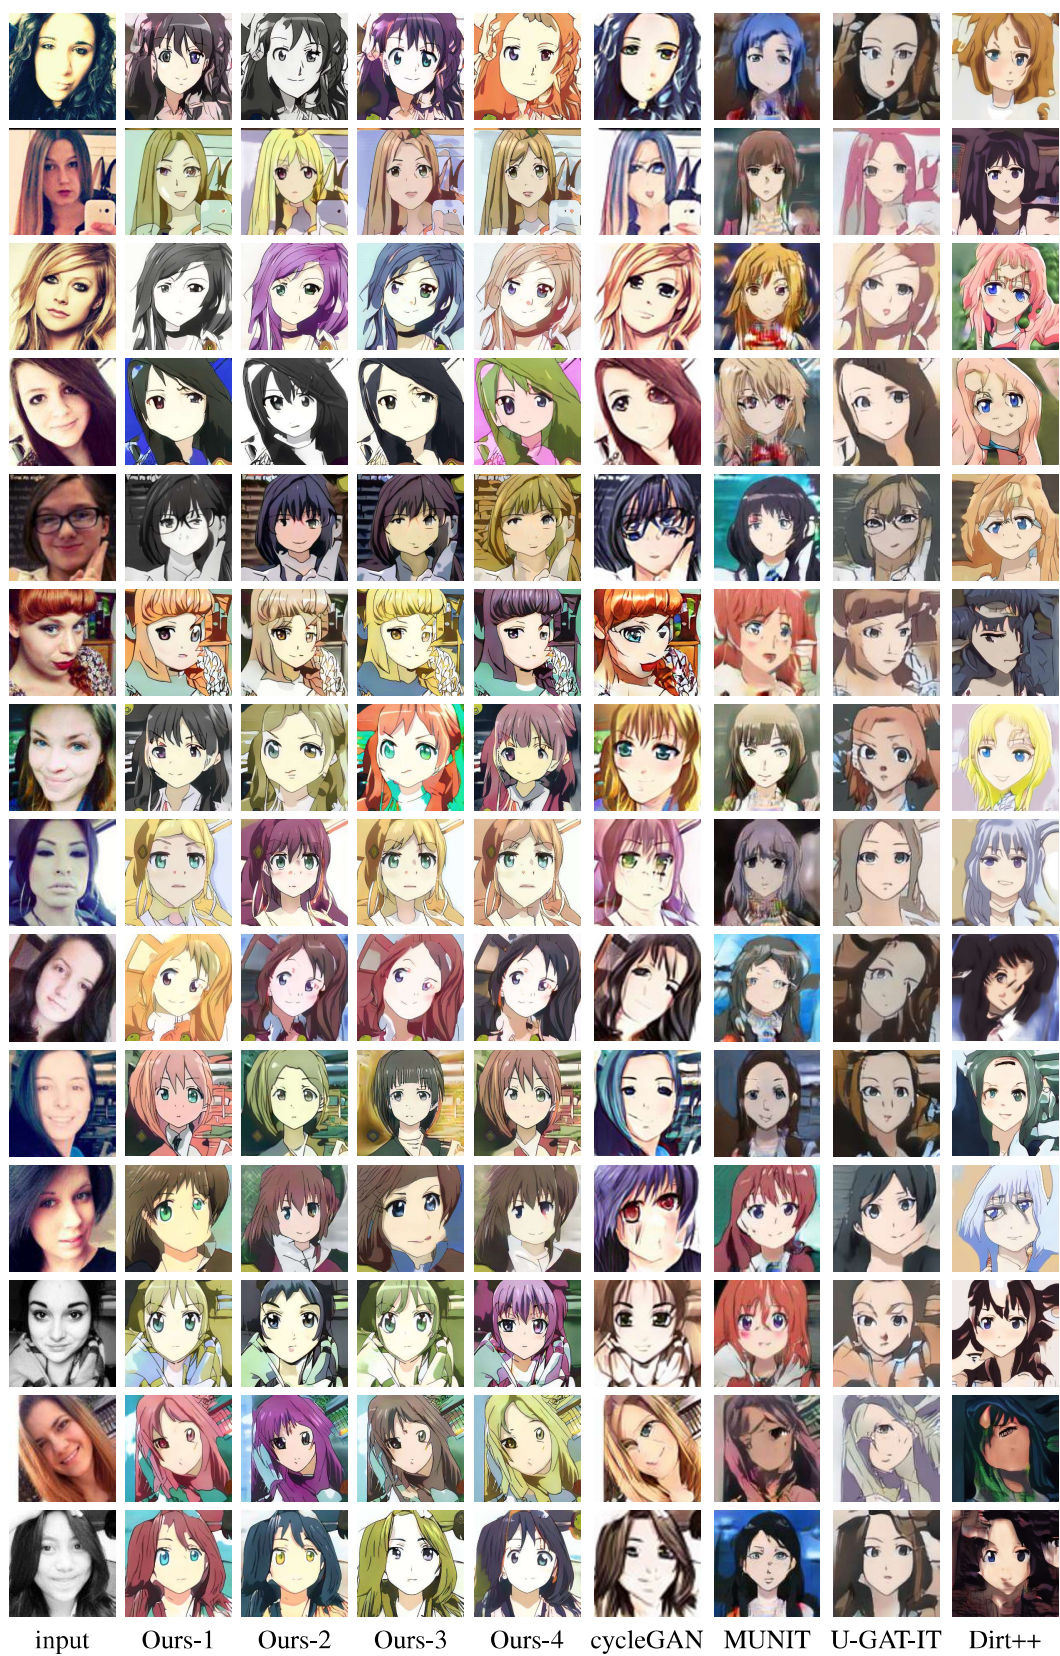

Figure 4: Selfie-to-anime translation



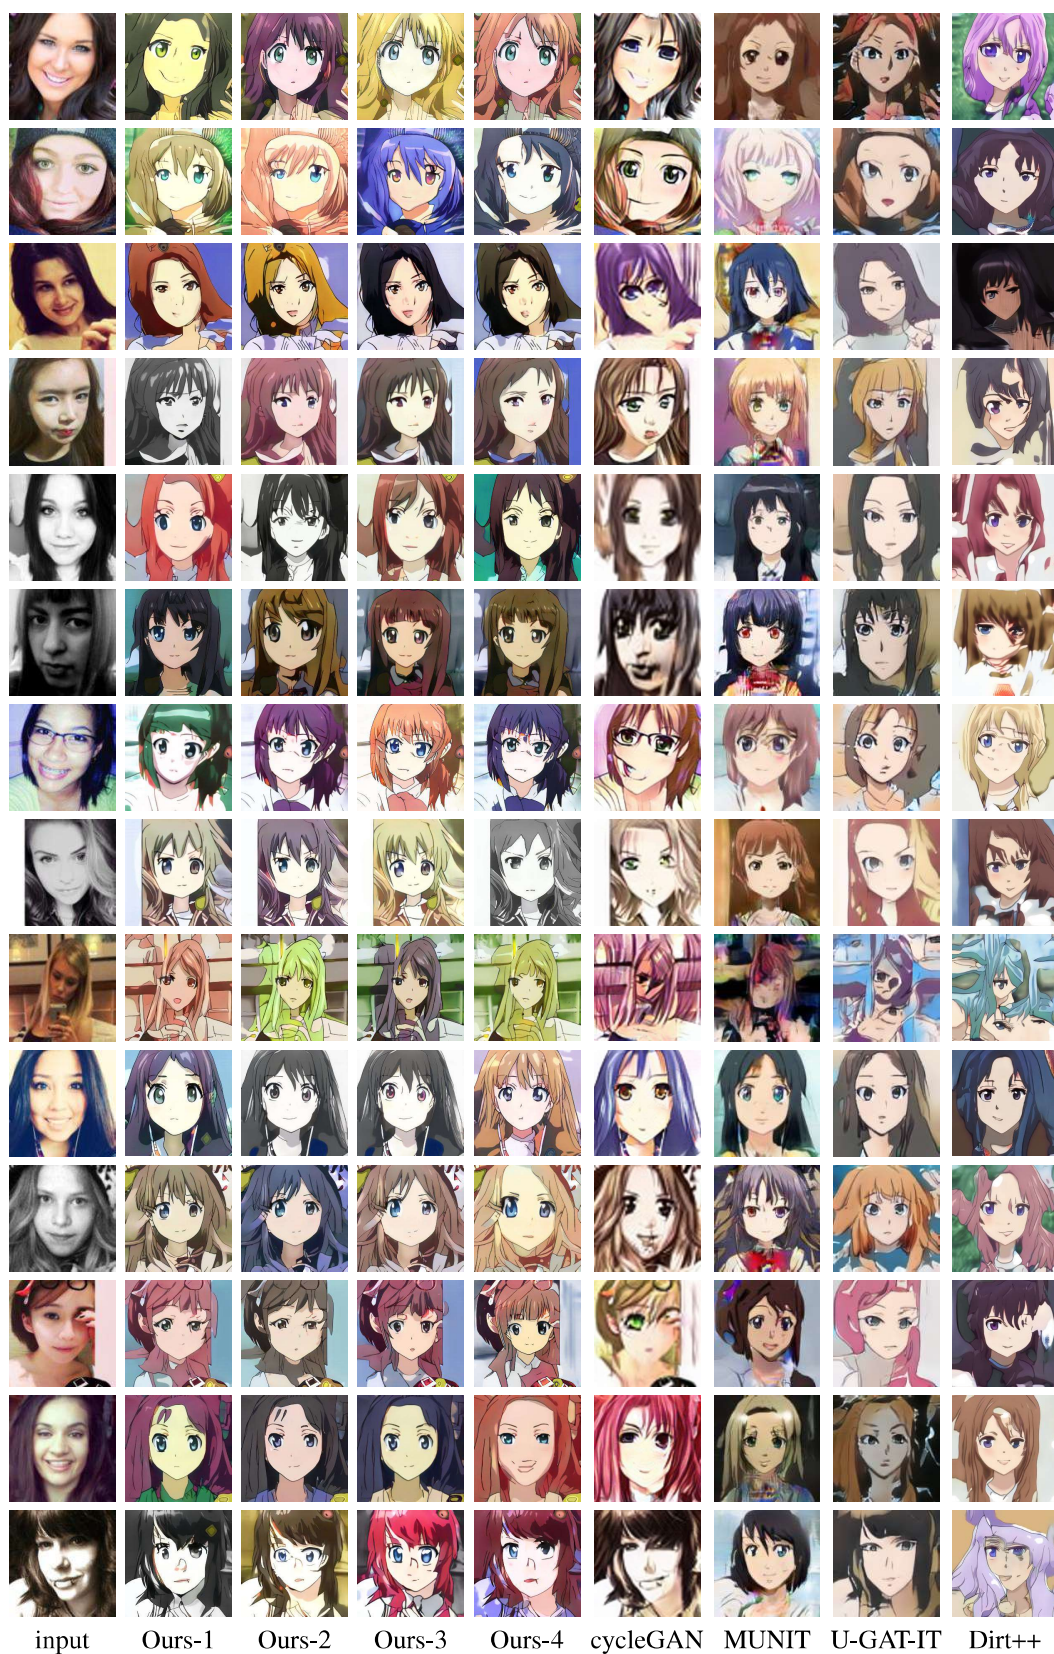

Figure 5: Selfie-to-anime translation



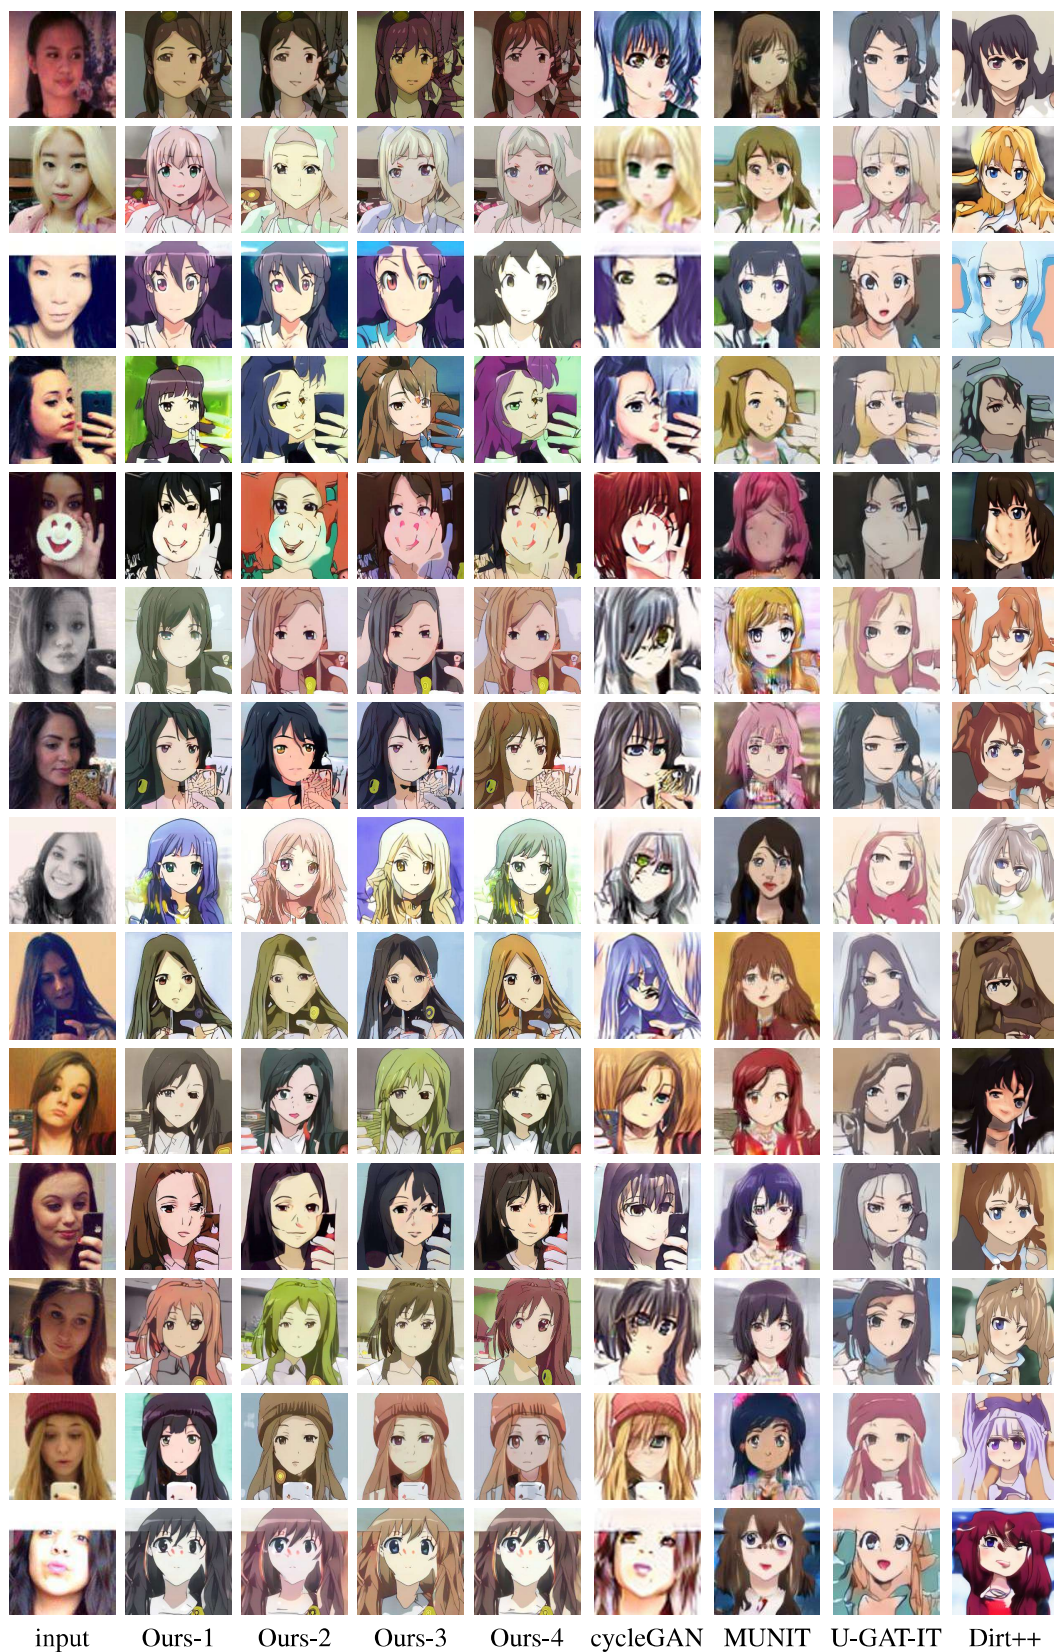

Figure 6: Selfie-to-anime translation



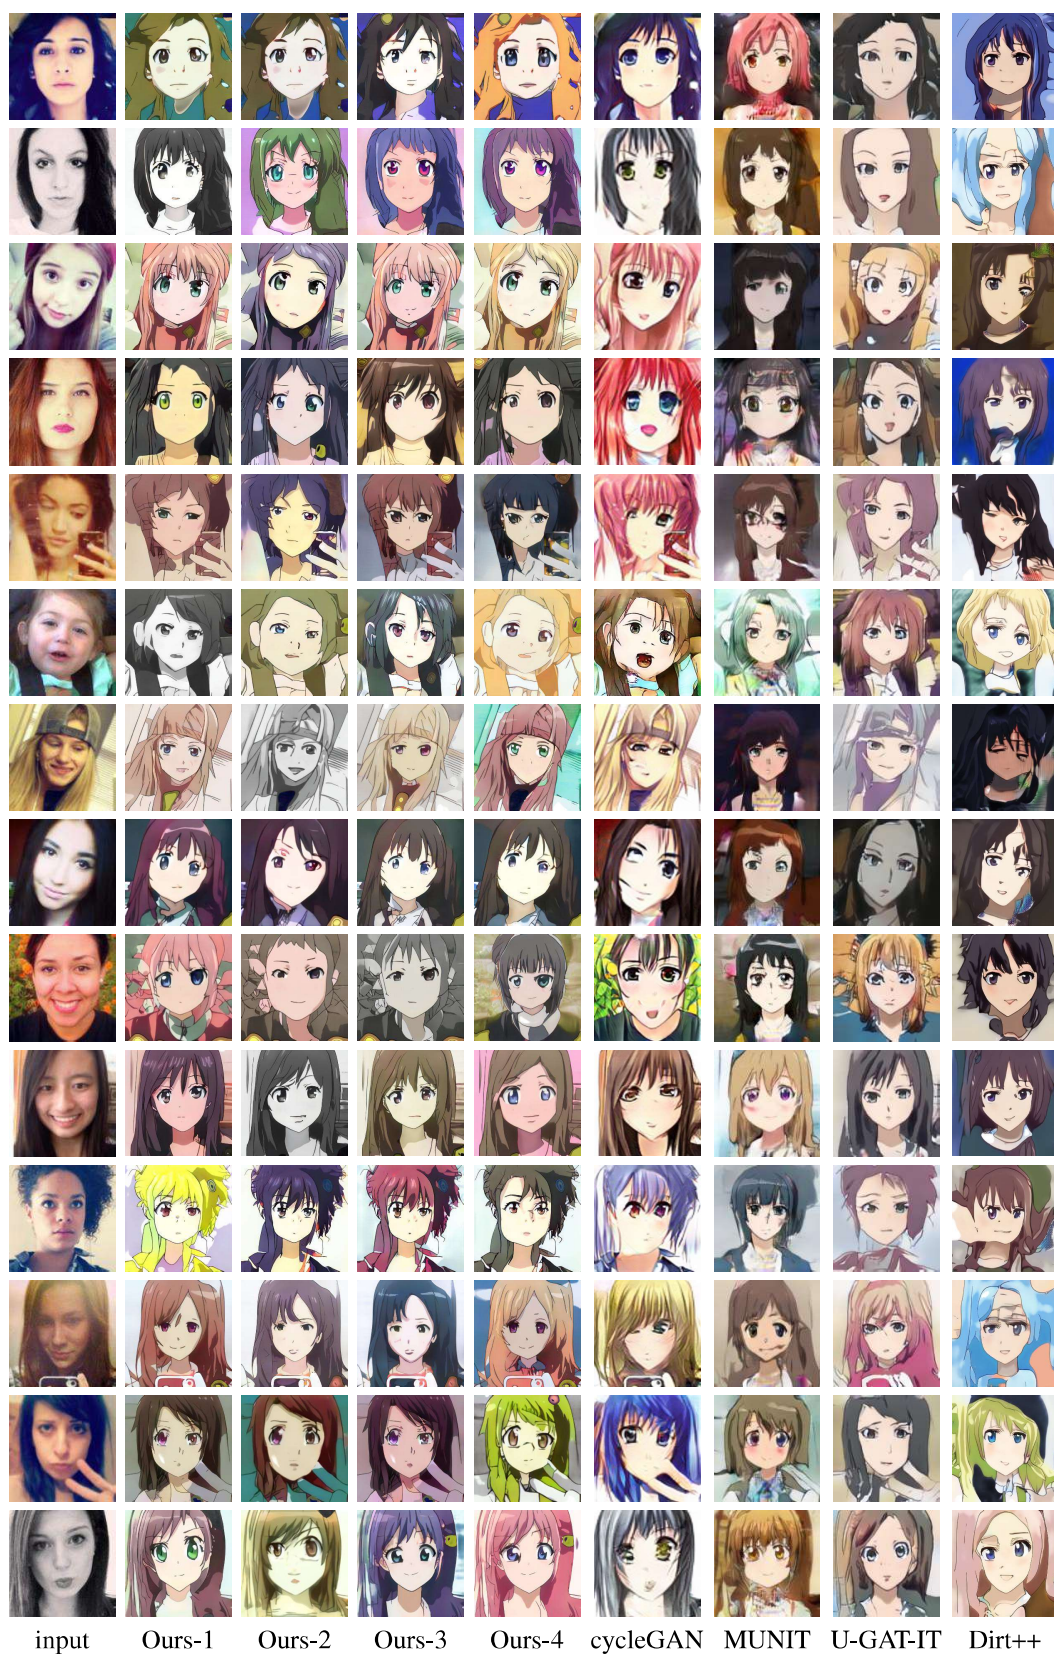

Figure 7: Selfie-to-anime translation
