# Supplementary material
Source: ML conference proceedings conference paper supplement (https://openaccess.thecvf.com/content/CVPR_2020/html/Nizan_Breaking_the_Cycle_CVPR_2020_paper.html)
Supplement: Supplementary file 4 [file Nizan_Breaking_the_Cycle_CVPR_2020_supplemental.zip]

# Breaking the cycle—Colleagues are all you need

## Supplementary #4—Architecture

Ori Nizan  
 Technion, Israel  
 snizori@campus.technion.ac.il

Ayellet Tal  
 Technion, Israel  
 ayellet@ee.technion.ac.il

| Generator-Encoder |           |             |        |         |           |            |             |
|-------------------|-----------|-------------|--------|---------|-----------|------------|-------------|
| Layer             | # filters | kernel_size | stride | padding | norm      | activation | pad type    |
| Conv2d            | 64        | 7           | 1      | 3       | <i>in</i> | ReLU       | <i>zero</i> |
| Conv2d            | 128       | 4           | 2      | 1       | <i>in</i> | ReLU       | <i>zero</i> |
| Conv2d            | 256       | 4           | 2      | 1       | <i>in</i> | ReLU       | <i>zero</i> |
| ResBlock 1        |           |             |        |         |           |            |             |
| Conv2d            | 256       | 3           | 1      | 1       | <i>in</i> | ReLU       | <i>zero</i> |
| Conv2d            | 256       | 3           | 1      | 1       | <i>in</i> | None       | <i>zero</i> |
| ResBlock 2        |           |             |        |         |           |            |             |
| Conv2d            | 256       | 3           | 1      | 1       | <i>in</i> | ReLU       | <i>zero</i> |
| Conv2d            | 256       | 3           | 1      | 1       | <i>in</i> | None       | <i>zero</i> |
| ResBlock 3        |           |             |        |         |           |            |             |
| Conv2d            | 256       | 3           | 1      | 1       | <i>in</i> | ReLU       | <i>zero</i> |
| Conv2d            | 256       | 3           | 1      | 1       | <i>in</i> | None       | <i>zero</i> |
| ResBlock 4        |           |             |        |         |           |            |             |
| Conv2d            | 256       | 3           | 1      | 1       | <i>in</i> | ReLU       | <i>zero</i> |
| Conv2d            | 256       | 3           | 1      | 1       | <i>in</i> | None       | <i>zero</i> |
| ResBlock 5        |           |             |        |         |           |            |             |
| Conv2d            | 256       | 3           | 1      | 1       | <i>in</i> | ReLU       | <i>zero</i> |
| Conv2d            | 256       | 3           | 1      | 1       | <i>in</i> | None       | <i>zero</i> |

Figure 1: Encoder architecture.

| <b>Generator-Decoder</b> |                |             |        |         |              |             |             |
|--------------------------|----------------|-------------|--------|---------|--------------|-------------|-------------|
| Layer                    | # filters      | kernel_size | stride | padding | norm         | activation  | pad type    |
| ResBlock 1               |                |             |        |         |              |             |             |
| Conv2d                   | 256            | 3           | 1      | 1       | <i>adain</i> | ReLU        | <i>zero</i> |
| Conv2d                   | 256            | 3           | 1      | 1       | <i>adain</i> | None        | <i>zero</i> |
| ResBlock 2               |                |             |        |         |              |             |             |
| Conv2d                   | 256            | 3           | 1      | 1       | <i>adain</i> | ReLU        | <i>zero</i> |
| Conv2d                   | 256            | 3           | 1      | 1       | <i>adain</i> | None        | <i>zero</i> |
| ResBlock 3               |                |             |        |         |              |             |             |
| Conv2d                   | 256            | 3           | 1      | 1       | <i>adain</i> | ReLU        | <i>zero</i> |
| Conv2d                   | 256            | 3           | 1      | 1       | <i>adain</i> | None        | <i>zero</i> |
| ResBlock 4               |                |             |        |         |              |             |             |
| Conv2d                   | 256            | 3           | 1      | 1       | <i>adain</i> | ReLU        | <i>zero</i> |
| Conv2d                   | 256            | 3           | 1      | 1       | <i>adain</i> | None        | <i>zero</i> |
| ResBlock 5               |                |             |        |         |              |             |             |
| Conv2d                   | 256            | 3           | 1      | 1       | <i>adain</i> | ReLU        | <i>zero</i> |
| Conv2d                   | 256            | 3           | 1      | 1       | <i>adain</i> | None        | <i>zero</i> |
| Upsample                 | scale_factor=2 |             |        |         | mode=nearest |             |             |
| Conv2d                   | 128            | 3           | 1      | 1       | <i>adain</i> | ReLU        | <i>zero</i> |
| Conv2d                   | 128            | 3           | 1      | 1       | <i>adain</i> | ReLU        | <i>zero</i> |
| Upsample                 | scale_factor=2 |             |        |         | mode=nearest |             |             |
| Conv2d                   | 128            | 3           | 1      | 1       | <i>adain</i> | ReLU        | <i>zero</i> |
| Conv2d                   | 128            | 3           | 1      | 1       | <i>adain</i> | ReLU        | <i>zero</i> |
| Conv2d                   | 64             | 1           | 1      | 0       | <i>adain</i> | ReLU        | <i>zero</i> |
| Conv2d                   | 64             | 1           | 1      | 0       | <i>adain</i> | ReLU        | <i>zero</i> |
| Conv2d                   | # masks *4     | 1           | 1      | 0       | None         | <i>tanh</i> | <i>zero</i> |
| Mask                     | see caption    |             |        |         |              |             |             |
| MLP                      | see Table 2    |             |        |         |              |             |             |

Table 1: **Decoder architecture.** This table describes the details of the generator’s decoder. Here, Mask =  $\tanh(10 * netOutput[: -1 * \#masks]) \rightarrow$  last dimensions of the network output.

| Layer       | Input dimension | Output dimension | Normalization | Activation |
|-------------|-----------------|------------------|---------------|------------|
| LinearBlock | 64              | 256              | None          | ReLU       |
| LinearBlock | 256             | 256              | None          | ReLU       |
| LinearBlock | 256             | 256              | None          | ReLU       |

Table 2: **MLP architecture.** This table shows the details of the last line in Table 2

| <b>Discriminator</b> |           |             |        |         |      |            |             |
|----------------------|-----------|-------------|--------|---------|------|------------|-------------|
| Layer                | # filters | kernel_size | stride | padding | norm | activation | pad type    |
| Conv2d               | 64        | 4           | 2      | 1       | None | LReLU      | <i>zero</i> |
| Conv2d               | 128       | 4           | 2      | 1       | None | LReLU      | <i>zero</i> |
| Conv2d               | 256       | 4           | 2      | 1       | None | LReLU      | <i>zero</i> |
| Conv2d               | 512       | 4           | 2      | 1       | None | LReLU      | <i>zero</i> |
| Conv2d               | 1         | 1           | 1      | 0       |      |            |             |

Table 3: **Discriminator architecture.** Our discriminator is multi-scale, similarly to [21], with two scales.

| <b>Council Discriminator</b> |           |             |        |         |      |            |          |
|------------------------------|-----------|-------------|--------|---------|------|------------|----------|
| Layer                        | # filters | kernel_size | stride | padding | norm | activation | pad type |
| Conv2d                       | 64        | 3           | 1      | 1       | none | LReLU      | zero     |
| Conv2d                       | 64        | 4           | 2      | 1       | none | LReLU      | zero     |
| Conv2d                       | 128       | 4           | 2      | 1       | none | LReLU      | zero     |
| Conv2d                       | 256       | 4           | 2      | 1       | none | LReLU      | zero     |
| Conv2d                       | 512       | 4           | 2      | 1       | none | LReLU      | zero     |
| Conv2d                       | 512       | 1           | 1      | 0       |      |            |          |

Table 4: **Council discriminator architecture.** Recall that the input is a concatenation of the output and the input.
